# Supplementary material for: Imidazolylpyridine-In(OTf)3catalyzed enantioselective allylation of ketimines derived from isatins
Source: Royal Society of Chemistry journal article supplement (doi:10.1039/c6ob00551a), 2016-01-01

# Supporting Information

## Imidazolylpyridine-In(OTf)<sub>3</sub> catalyzed enantioselective allylation of ketimines derived from isatins

Tingting Chen<sup>a</sup>, Chun Cai<sup>a</sup> \*

<sup>a</sup>Chemical Engineering College, Nanjing University of Science & Technology,  
Nanjing, Jiangsu 210094, P. R. China  
E-mail: c.cai@njust.edu.cn.

### 1. Experimental Section

#### 1.1 General

All reagents were purchased from commercial sources and used without treatment, unless otherwise indicated. The products were purified by column chromatography over silica gel. <sup>1</sup>H and <sup>13</sup>C NMR spectra were recorded on a Bruker AMX500 (500 MHz) spectrometer and tetramethylsilane (TMS) was used as a reference. Most of the products were known compounds and were identified by comparison of their physical and spectra data with those of authentic samples. Mass spectra are taken on a Thermo Scientific ISQ LT GC-MS instrument in the electron ionization (EI) mode. Enantiomeric excesses (ee) were determined by chiral HPLC using a Venusil CA column and Venusil CO column.

#### 1.2 Procedure for the synthesis of ketimines derived from isatins

Isatin ketimines were synthesized by using the standard literature procedures.<sup>1</sup> To the solution of the isatin (5 mmol) in ethanol (10 mL) was added the corresponding aniline (5 mmol) in one portion. Then, the reaction mixture was reacted in reflux and stirred for 2h. Once the reaction completed, the contents were cooled to room temperature. The precipitated isatin ketimine was collected by filtration and then washed with a 10% ethanol/hexane mixture. The solid product was then air dried and used without further purification.

#### 1.3 General procedure for the synthesis of 3-allyl 3-aminoxindoles

A mixture of In(OTf)<sub>3</sub> (0.005 mmol) and L1 (0.005 mmol) in methanol (1 mL) was stirred at room temperature for 1h. To the mixture were then added isatinimine (0.2 mmol), allyltributyltin (0.3 mmol) (caution! allyltributyltin is toxic and reactions should be conducted in a well-ventilated fume cupboard). After the starting material was consumed as indicated by TLC, the reaction mixture was poured into water and then extracted with EtOAc (3 × 10 mL). The combined organic phase was washed with water (3 × 10 mL), dried over anhydrous MgSO<sub>4</sub>, filtered and concentrated under reduced pressure. The crude product was purified by flash chromatography.

[1] N. A. Aslam, S. A. Babu, S. Rani, S. Mahajan, J. Solanki, M. Yasuda and A. Baba, *Eur. J. Org. Chem.*, **2015**, 4168.

## 2. Characterization of compounds

### 2.1 3-allyl-3-((4-methoxyphenyl)amino)indolin-2-one (2a)

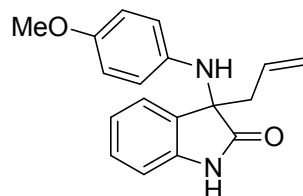

Chemical Formula: C<sub>18</sub>H<sub>18</sub>N<sub>2</sub>O<sub>2</sub>

Exact Mass: 294.14

Isolated as a colorless solid.  $[\alpha]_D^{25} = +68.8$  (c = 0.50 in CH<sub>2</sub>Cl<sub>2</sub>). The *ee* (94%) was determined by HPLC analysis, Venusil CA column, Hexane/i-PrOH 80:20, flow rate=0.7 mL/min, UV= 280 nm, minor enantiomer  $t_1 = 16.3$  min, major enantiomer  $t_2 = 17.1$  min. <sup>1</sup>H NMR (500 MHz, CDCl<sub>3</sub>)  $\delta$  8.43 (s, 1H), 7.34 (d,  $J = 7.4$  Hz, 1H), 7.27 (dd,  $J = 7.7, 1.1$  Hz, 1H), 7.10 (dd,  $J = 15.2, 7.2$  Hz, 1H), 6.89 (d,  $J = 7.7$  Hz, 1H), 6.61 – 6.53 (m, 2H), 6.38 – 6.31 (m, 2H), 5.92 – 5.66 (m, 1H), 5.23 (t,  $J = 14.7$  Hz, 2H), 4.21 (s, 1H), 3.64 (s, 3H), 2.70 (ddd,  $J = 21.2, 13.3, 7.4$  Hz, 2H). <sup>13</sup>C NMR (125 MHz, CDCl<sub>3</sub>)  $\delta$  179.33, 152.42, 138.89, 137.77, 129.42, 127.96, 123.32, 121.92, 119.92, 116.66, 113.41, 109.48, 76.29, 64.26, 54.40, 43.34. MS (EI)  $m/z$ : 294 [M<sup>+</sup>].

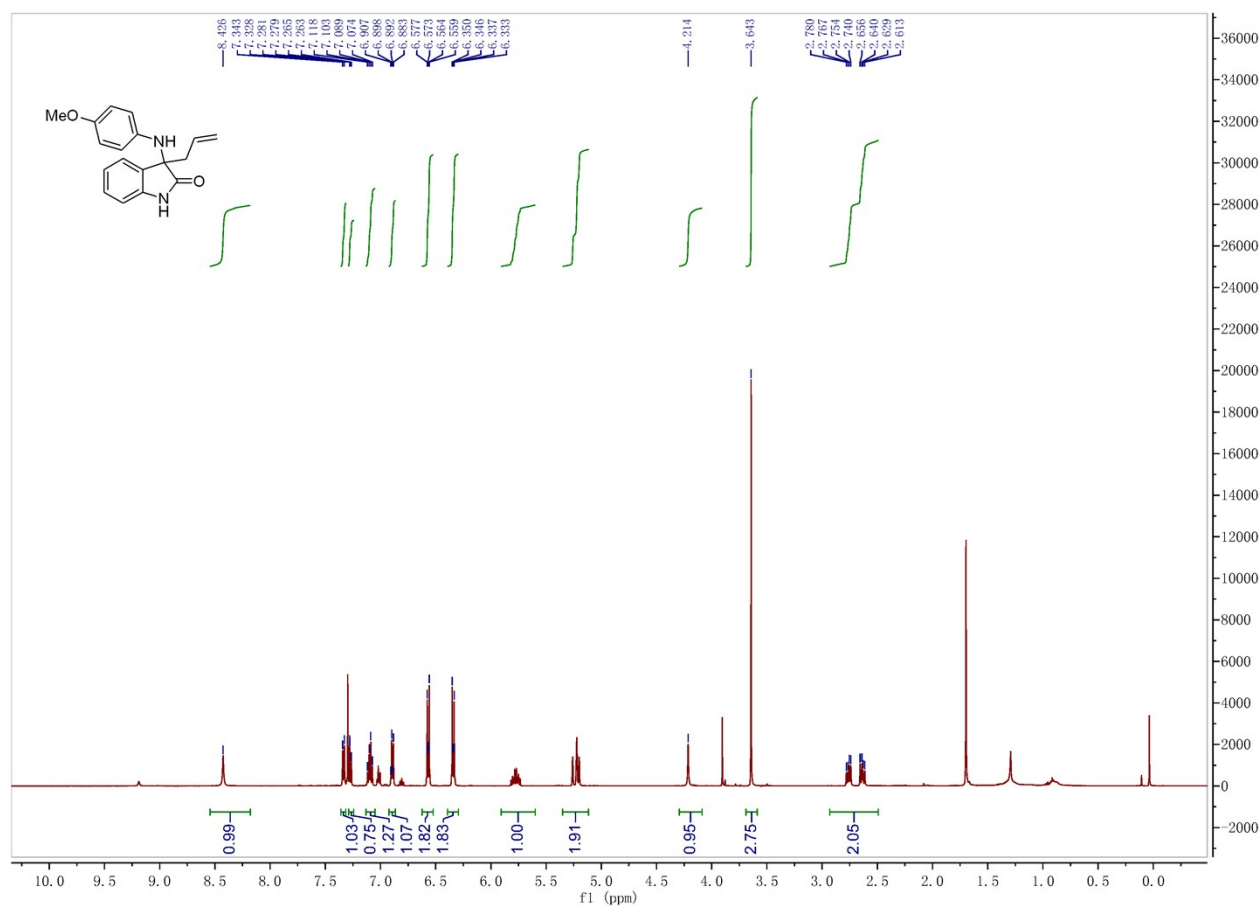

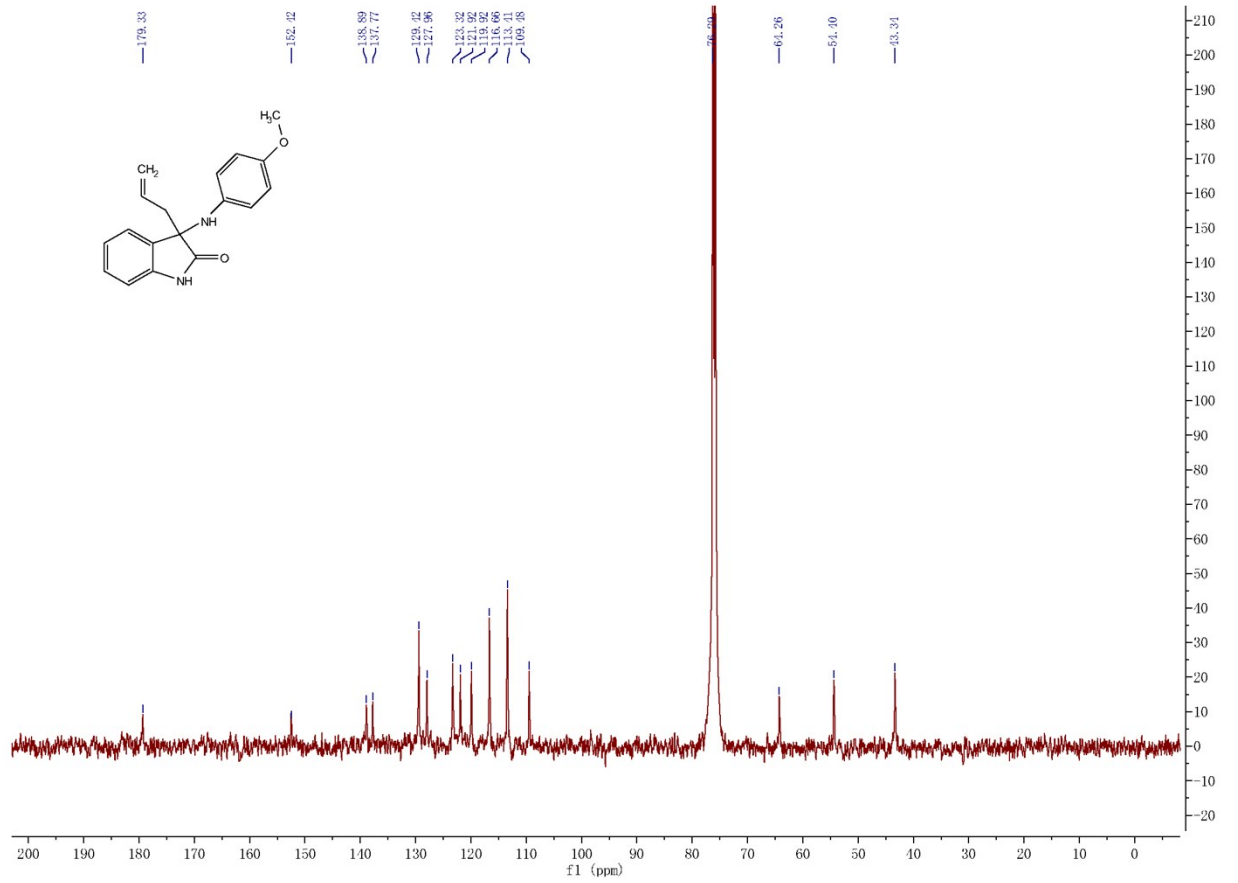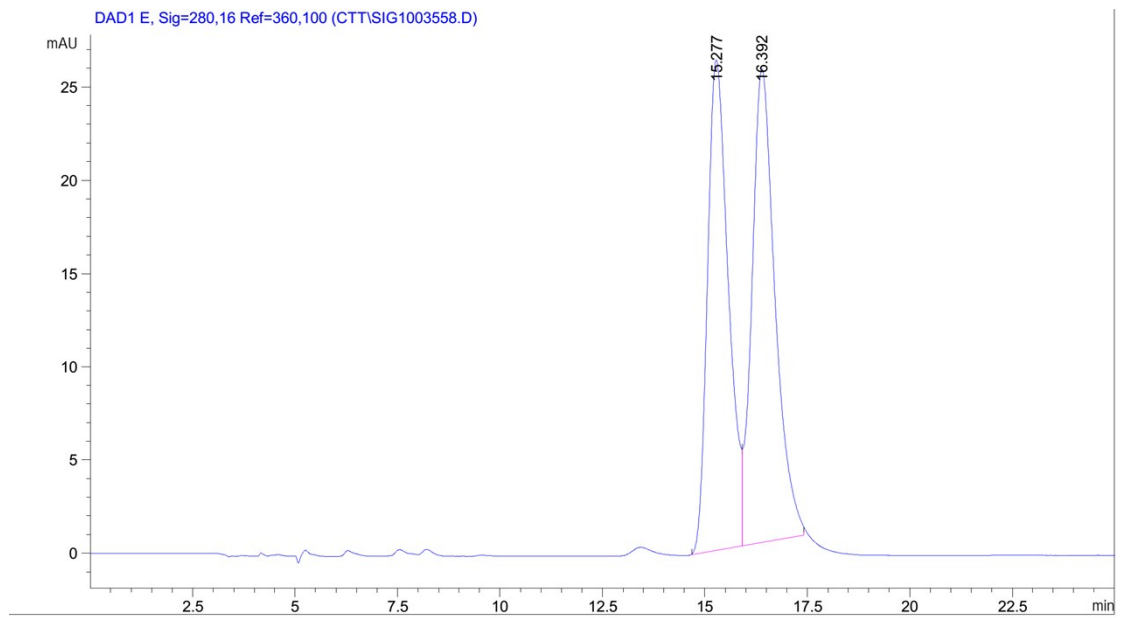

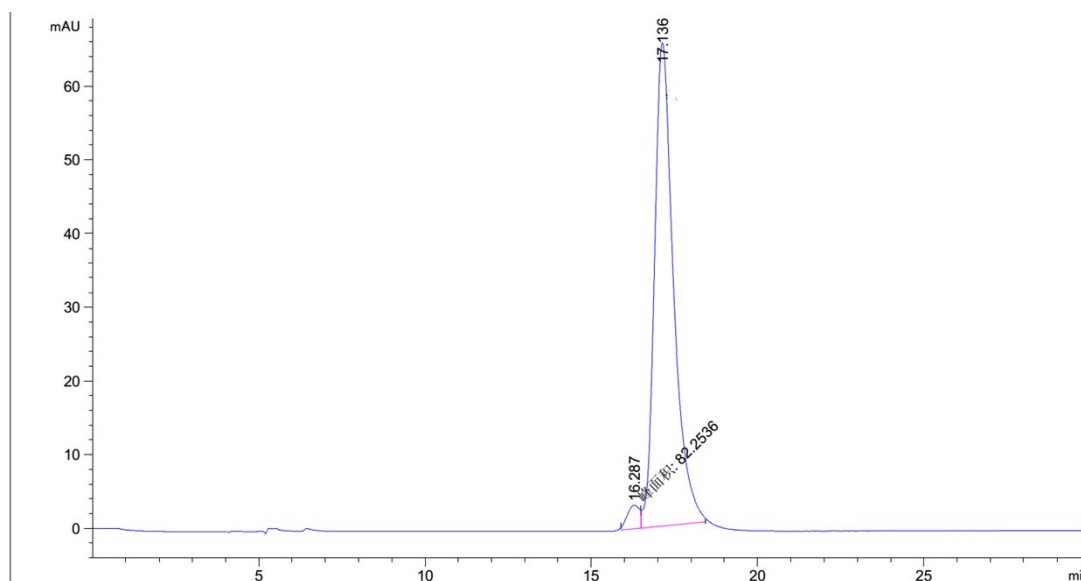

信号 1: DAD1 E, Sig=280,16 Ref=360,100

| 峰 # | 保留时间 [min] | 类型 | 峰宽 [min] | 峰面积 [mAU*s] | 峰高 [mAU] | 峰面积 %   |
|-----|------------|----|----------|-------------|----------|---------|
| 1   | 16.287     | MF | 0.4307   | 82.25359    | 3.18324  | 3.0464  |
| 2   | 17.136     | FM | 0.6656   | 2617.78369  | 65.55392 | 96.9536 |

### 2.2 3-allyl-3-(phenylamino)indolin-2-one (2b)

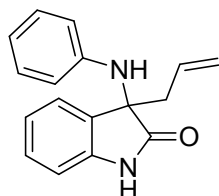

Chemical Formula: C<sub>17</sub>H<sub>16</sub>N<sub>2</sub>O  
Exact Mass: 264.13

Isolated as a colorless solid.  $[\alpha]_D^{25} = +60.0$  (c = 0.72 in CH<sub>2</sub>Cl<sub>2</sub>). The *ee* (84%) was determined by HPLC analysis, Venusil CA column, Hexane/*i*-PrOH 80:20, flow rate = 0.7 mL/min, UV = 280 nm, minor enantiomer  $t_1 = 21.3$  min, major enantiomer  $t_2 = 17.3$  min. <sup>1</sup>H NMR (500 MHz, CDCl<sub>3</sub>)  $\delta$  8.90 (s, 1H), 7.27 – 7.22 (m, 2H), 7.04 (td,  $J = 7.7, 0.8$  Hz, 1H), 7.01 – 6.93 (m, 2H), 6.90 (t,  $J = 8.9$  Hz, 1H), 6.65 (t,  $J = 7.3$  Hz, 1H), 5.89 – 5.69 (m, 1H), 5.38 – 5.15 (m, 2H), 4.53 (s, 1H), 2.68 (ddd,  $J = 64.3, 13.3, 7.4$  Hz, 2H). <sup>13</sup>C NMR (125 MHz, CDCl<sub>3</sub>)  $\delta$  180.44, 145.22, 139.81, 130.38, 129.16, 124.15, 123.13, 121.30, 119.06, 114.65, 110.82, 64.24, 44.79. MS (EI)  $m/z$ : 264 [M<sup>+</sup>].

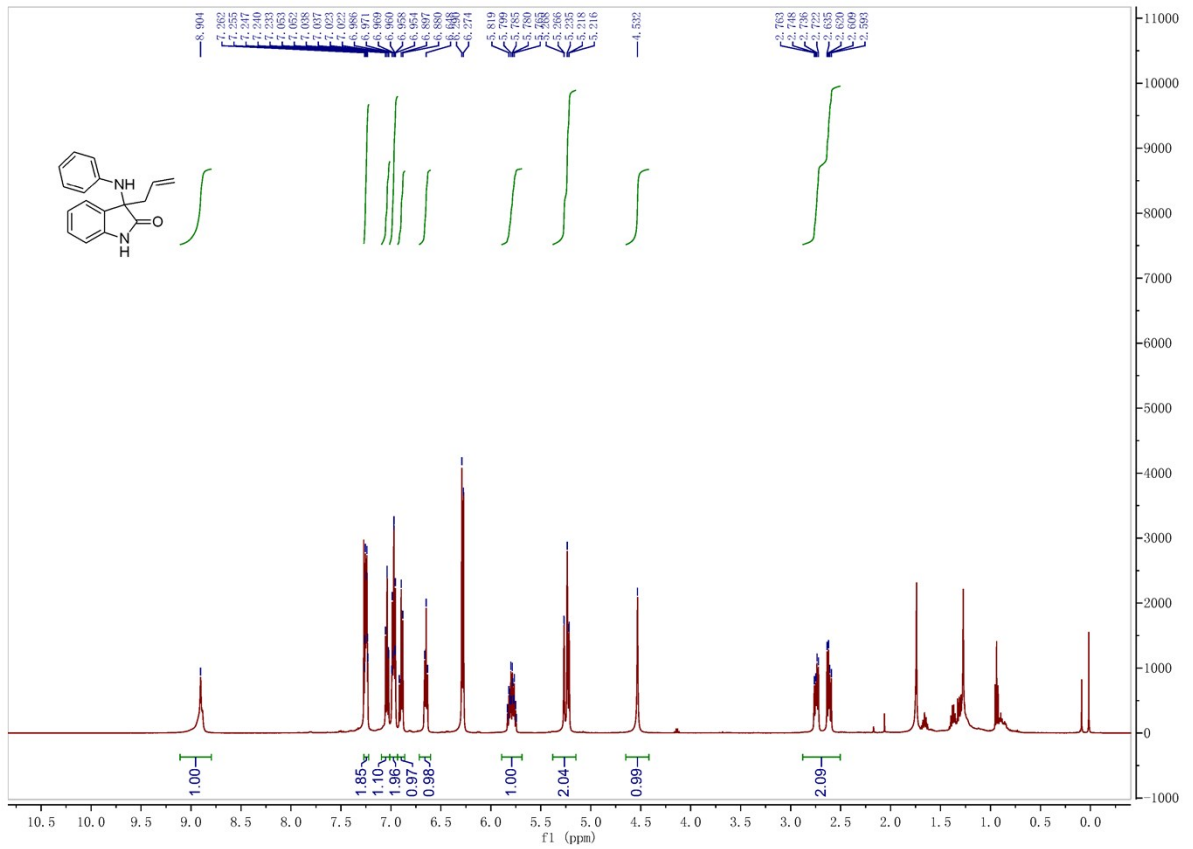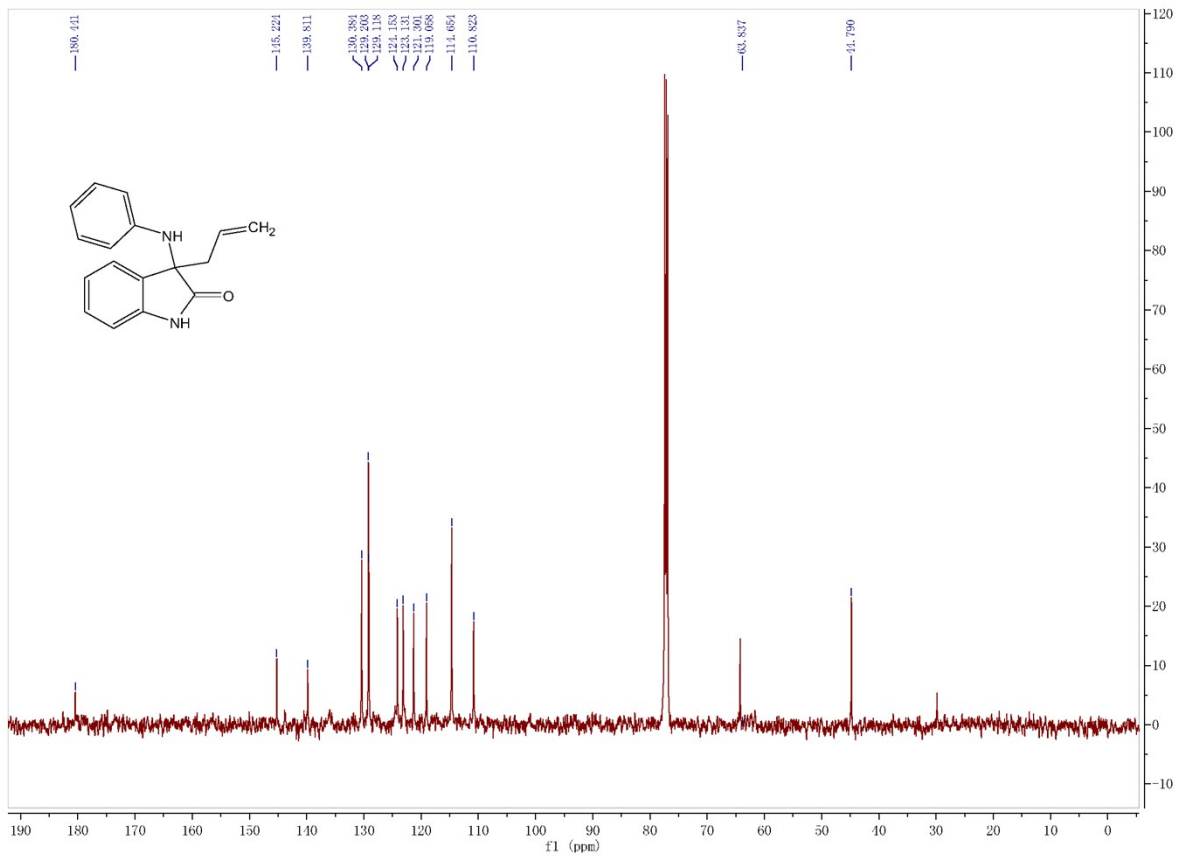

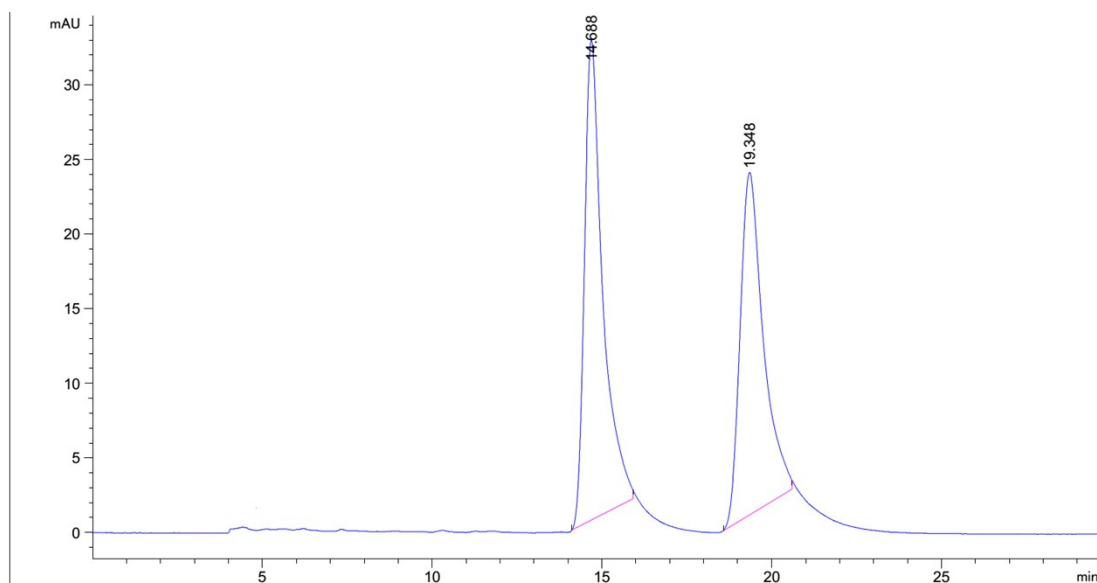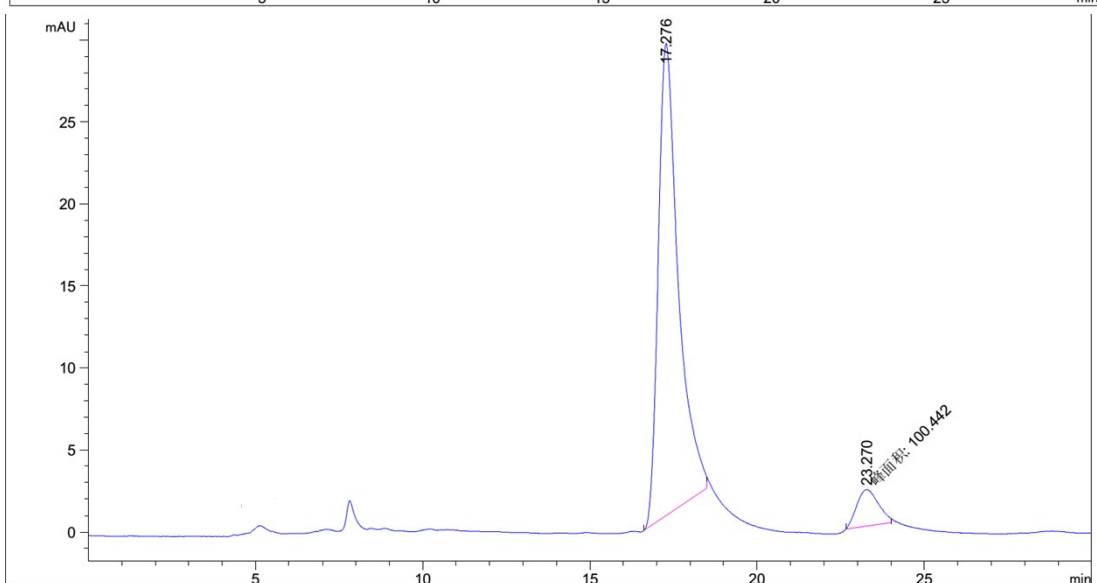

信号 1: DAD1 E, Sig=280,16 Ref=360,100

| 峰 # | 保留时间 [min] | 类型 | 峰宽 [min] | 峰面积 [mAU*s] | 峰高 [mAU] | 峰面积 %   |
|-----|------------|----|----------|-------------|----------|---------|
| 1   | 17.276     | BB | 0.6193   | 1202.56042  | 28.79307 | 92.2915 |
| 2   | 23.270     | MM | 0.7513   | 100.44203   | 2.22831  | 7.7085  |

### 2.3 3-allyl-3-(p-tolylamino)indolin-2-one (2c)

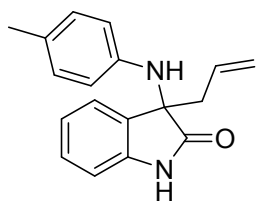

Chemical Formula: C<sub>18</sub>H<sub>18</sub>N<sub>2</sub>O  
Exact Mass: 278.14

Isolated as a colorless solid.  $[\alpha]_D^{25} = +68.7$  (c = 0.61 in CH<sub>2</sub>Cl<sub>2</sub>). The ee (72%) was determined by

HPLC analysis, Venusil CA column, Hexane/i-PrOH 80:20, flow rate=0.7 mL/min, UV= 254 nm, minor enantiomer  $t_1 = 13.3$  min, major enantiomer  $t_2 = 11.5$  min.  $^1\text{H}$  NMR (500 MHz,  $\text{CDCl}_3$ )  $\delta$  8.89 (s, 1H), 7.29 – 7.20 (m, 2H), 7.03 (t,  $J = 7.2$  Hz, 1H), 6.84 (d,  $J = 7.7$  Hz, 1H), 6.77 (t,  $J = 6.9$  Hz, 2H), 6.21 (d,  $J = 8.4$  Hz, 2H), 5.78 (ddt,  $J = 14.8, 10.1, 7.4$  Hz, 1H), 5.22 (t,  $J = 12.4$  Hz, 2H), 4.40 (s, 1H), 2.67 (ddd,  $J = 64.4, 13.3, 7.4$  Hz, 2H), 2.11 (s, 3H).  $^{13}\text{C}$  NMR (125 MHz,  $\text{CDCl}_3$ )  $\delta$  180.39, 142.86, 139.87, 130.54, 129.70, 129.01, 128.41, 124.19, 123.05, 121.13, 115.09, 110.76, 44.37, 20.48. MS (EI)  $m/z$ : 278  $[\text{M}^+]$ .

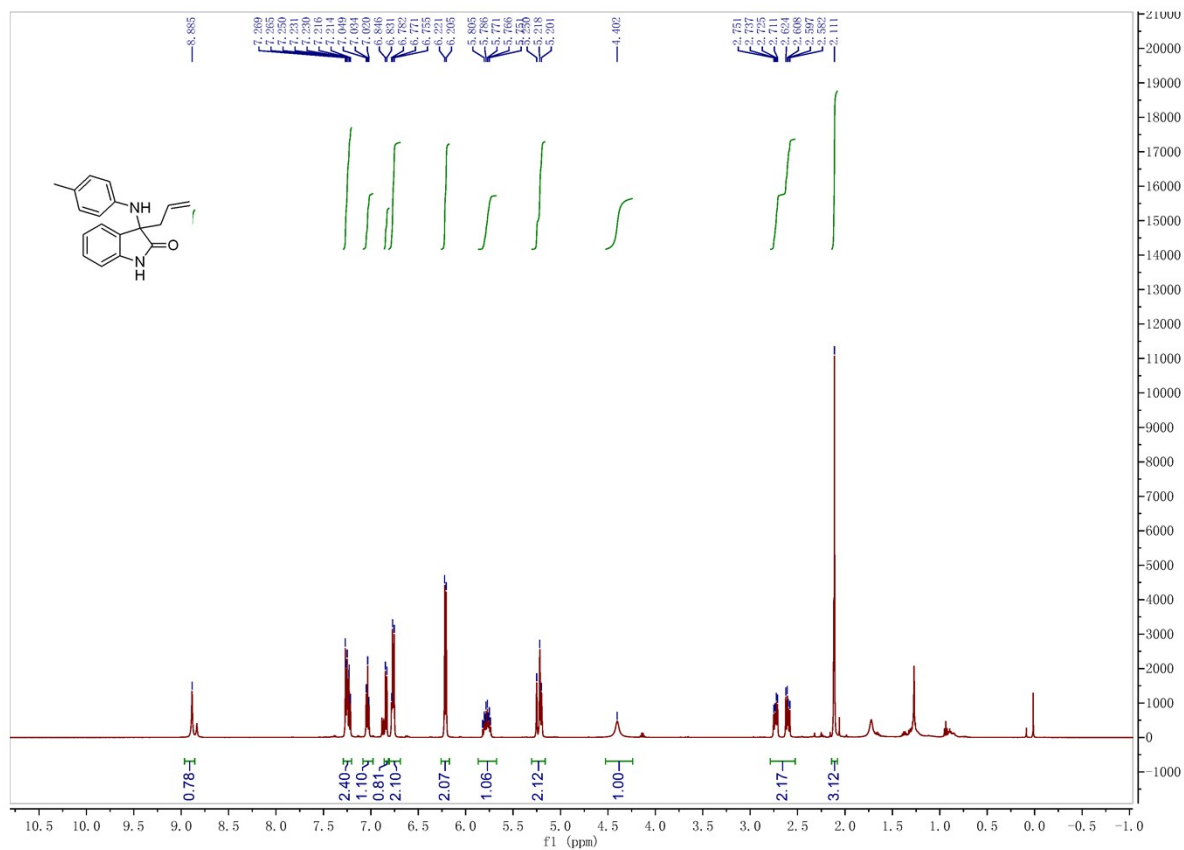

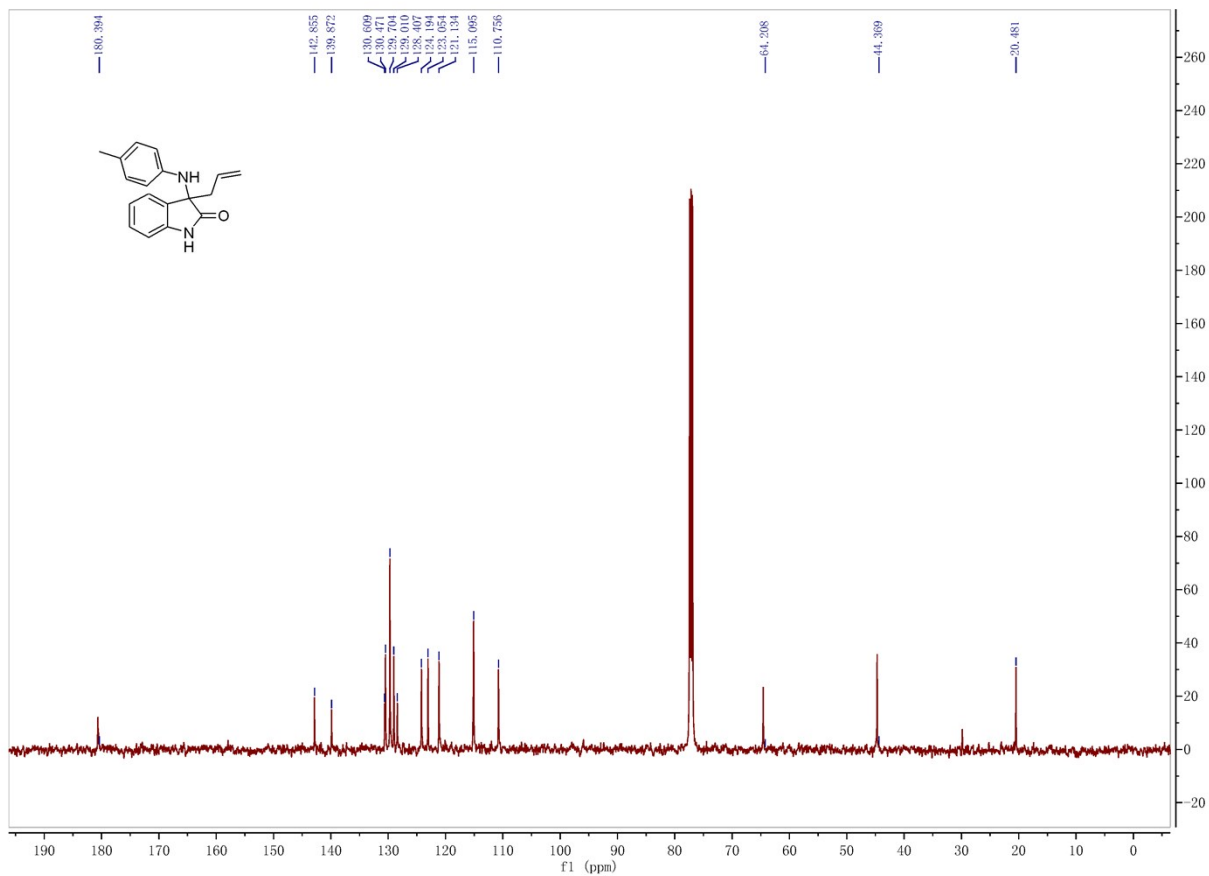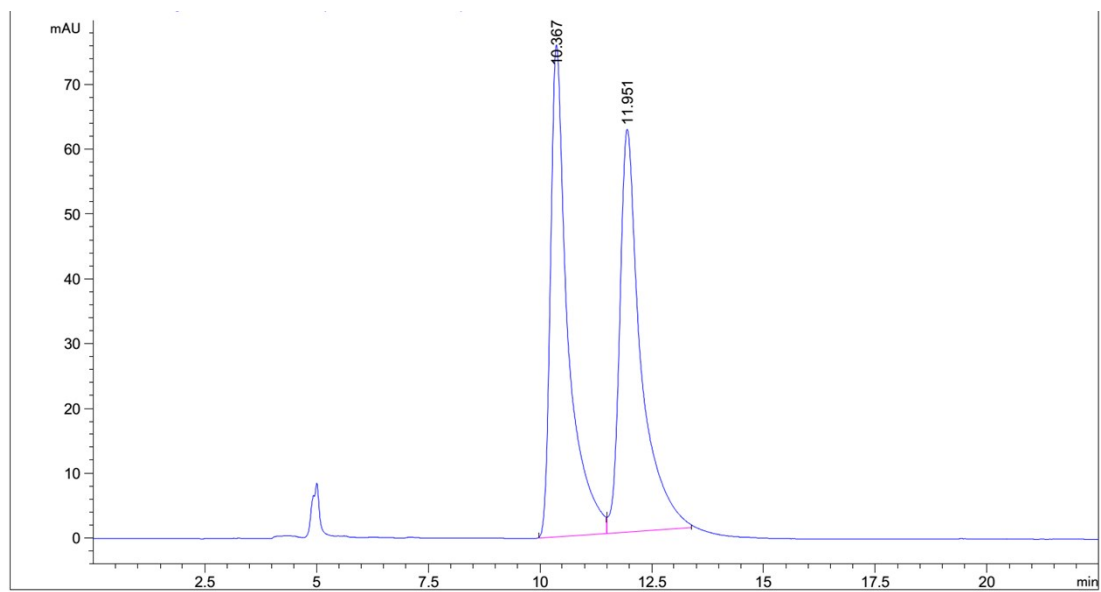



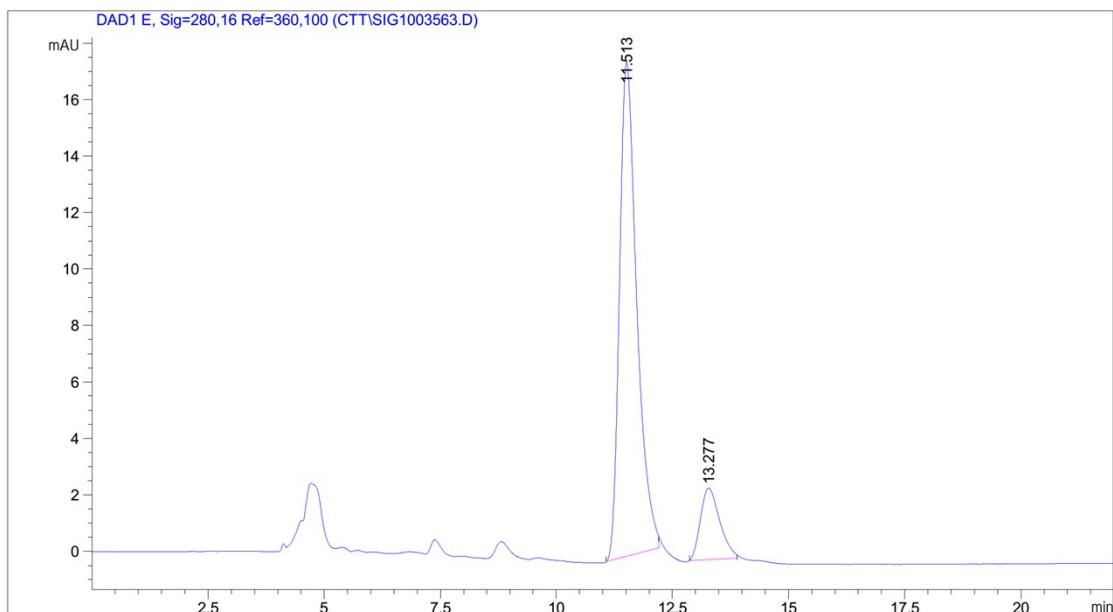

信号 1: DAD1 E, Sig=280,16 Ref=360,100

| 峰 # | 保留时间 [min] | 类型 | 峰宽 [min] | 峰面积 [mAU*s] | 峰高 [mAU] | 峰面积 %   |
|-----|------------|----|----------|-------------|----------|---------|
| 1   | 11.513     | BB | 0.3872   | 452.04260   | 17.50709 | 86.1199 |
| 2   | 13.277     | BB | 0.4280   | 72.85679    | 2.52954  | 13.8801 |

2,4 3-allyl-3-((4-chlorophenyl)amino)indolin-2-one (**2d**)

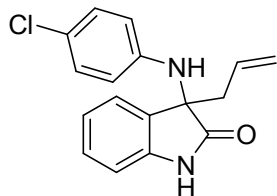

Chemical Formula: C<sub>17</sub>H<sub>15</sub>ClN<sub>2</sub>O  
Exact Mass: 298.09

Isolated as a brown solid.  $[\alpha]_D^{25} = +87.3$  (c = 0.81 in CH<sub>2</sub>Cl<sub>2</sub>). The *ee* (94%) was determined by HPLC analysis, Venusil CA column, Hexane/*i*-PrOH 80:20, flow rate=0.7 mL/min, UV= 280 nm, minor enantiomer  $t_1 = 12.7$  min, major enantiomer  $t_2 = 17.1$  min. <sup>1</sup>H NMR (500 MHz, CDCl<sub>3</sub>)  $\delta$  8.38 (s, 1H), 7.28 (dd,  $J = 7.7, 1.2$  Hz, 1H), 7.22 (d,  $J = 7.3$  Hz, 1H), 7.10 – 6.97 (m, 3H), 6.89 (d,  $J = 7.8$  Hz, 1H), 6.20 – 6.07 (m, 2H), 5.77 (ddt,  $J = 17.4, 10.3, 7.4$  Hz, 1H), 5.31 – 5.18 (m, 2H), 4.49 (s, 1H), 2.64 (ddd,  $J = 61.0, 13.4, 7.4$  Hz, 2H). <sup>13</sup>C NMR (125 MHz, CDCl<sub>3</sub>)  $\delta$  179.61, 144.22, 139.57, 131.97, 130.12, 129.85, 129.40, 124.18, 123.32, 121.58, 116.27, 111.07, 110.78, 64.04, 44.70. MS (EI)  $m/z$ : 298 [M<sup>+</sup>].

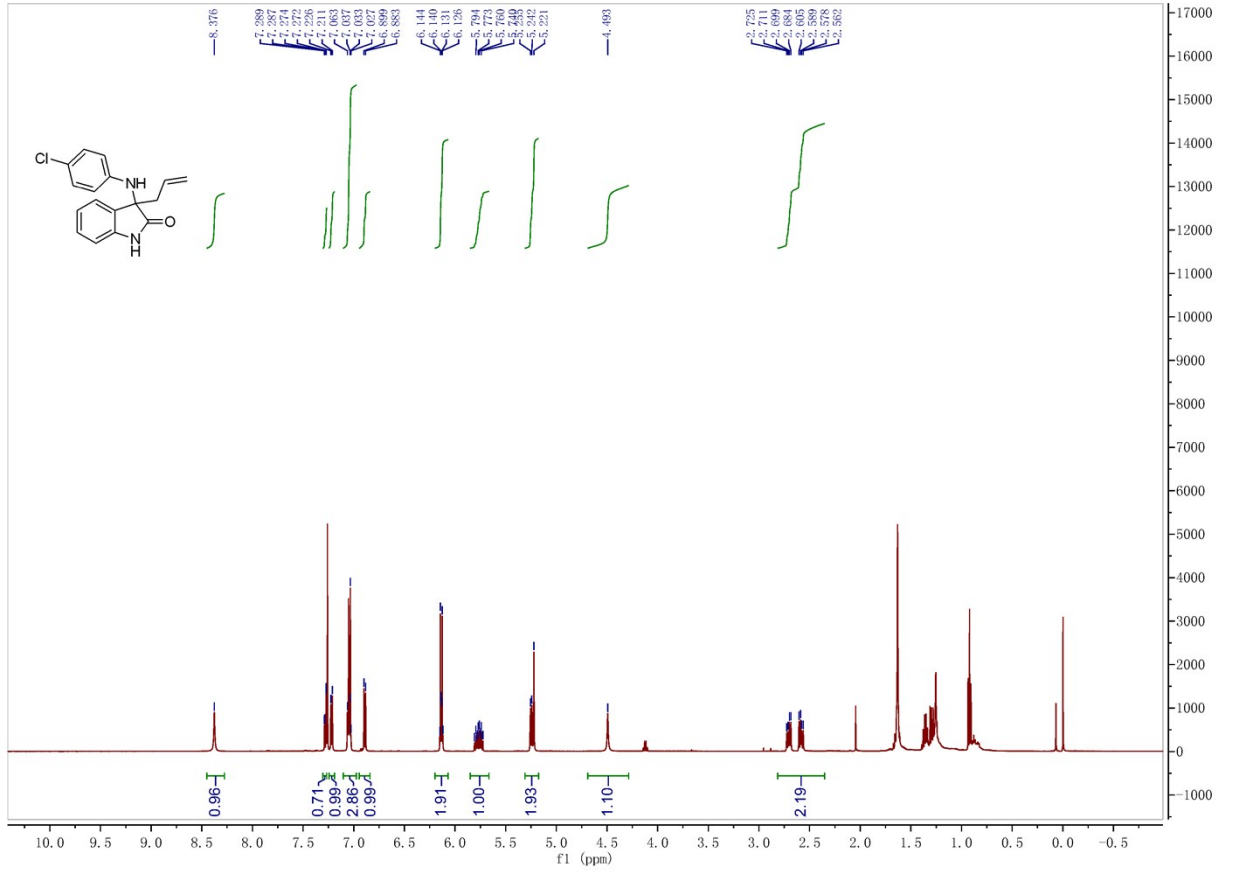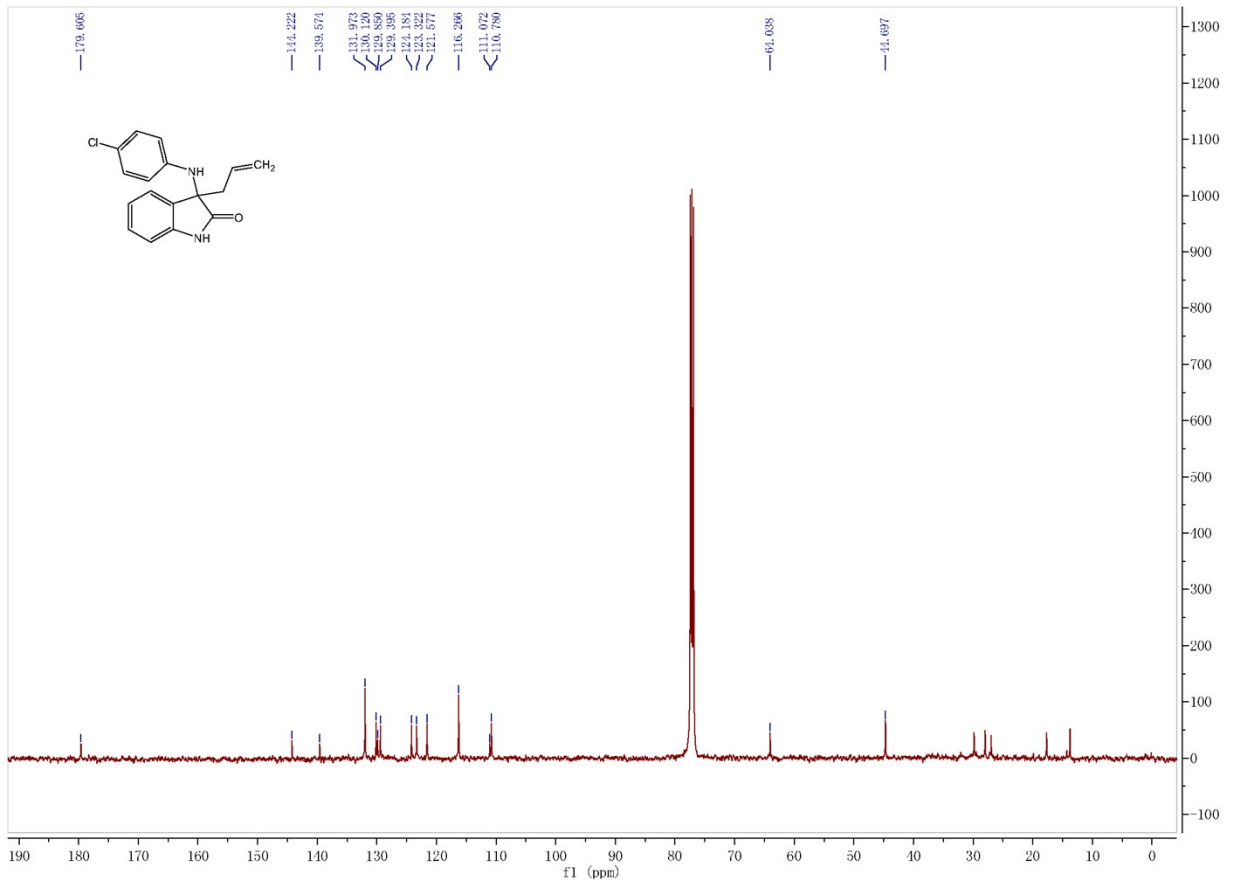

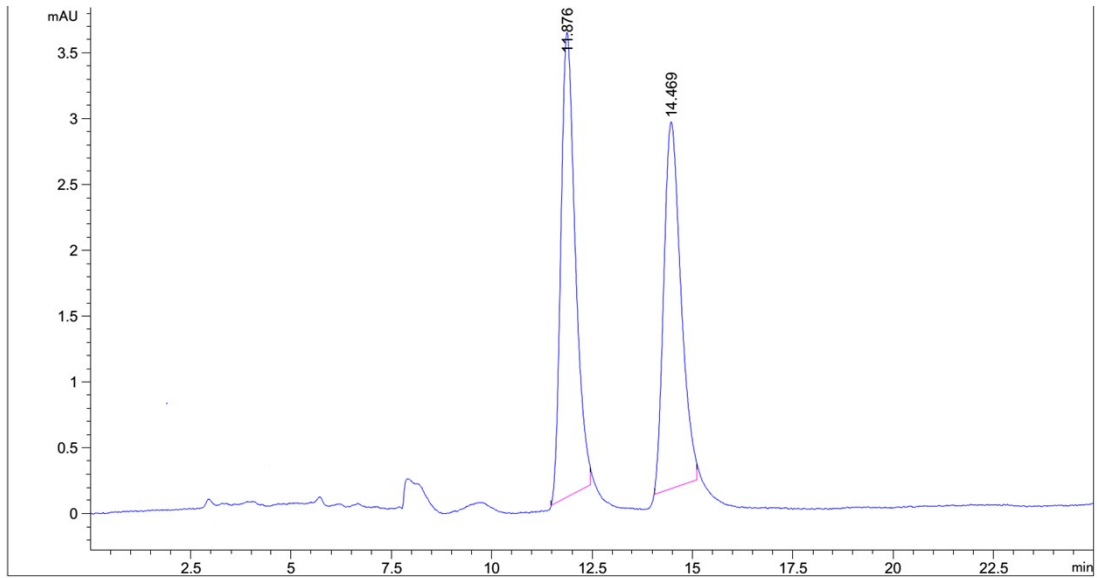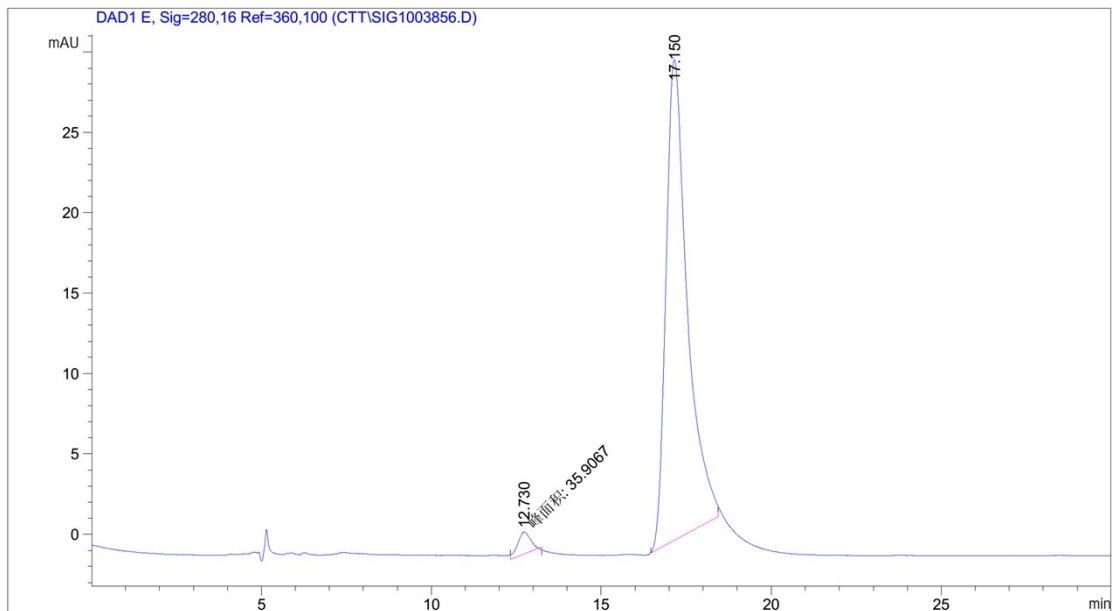

信号 1: DAD1 E, Sig=280,16 Ref=360,100

| 峰 # | 保留时间 [min] | 类型 | 峰宽 [min] | 峰面积 [mAU*s] | 峰高 [mAU] | 峰面积 %   |
|-----|------------|----|----------|-------------|----------|---------|
| 1   | 12.730     | MM | 0.4378   | 35.90672    | 1.36705  | 2.6770  |
| 2   | 17.150     | BB | 0.6455   | 1305.40759  | 29.89285 | 97.3230 |

2.5 3-allyl-3-((4-bromophenyl)amino)indolin-2-one (2e)

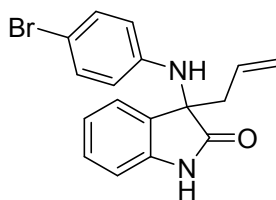

Chemical Formula: C<sub>17</sub>H<sub>15</sub>BrN<sub>2</sub>O  
Exact Mass: 342.04

Isolated as a brown solid.  $[\alpha]_D^{25} = +81.5$  ( $c = 0.79$  in  $\text{CH}_2\text{Cl}_2$ ). The *ee* (91%) was determined by HPLC analysis, Venusil CA column, Hexane/*i*-PrOH 80:20, flow rate=0.7 mL/min, UV= 280 nm, minor enantiomer  $t_1 = 12.0$  min, major enantiomer  $t_2 = 15.5$  min.  $^1\text{H}$  NMR (500 MHz,  $\text{CDCl}_3$ )  $\delta$  8.36 (s, 1H), 7.28 (dd,  $J = 7.7, 1.2$  Hz, 1H), 7.23 (d,  $J = 7.3$  Hz, 1H), 7.05 (td,  $J = 7.6, 0.8$  Hz, 1H), 6.90 (dd,  $J = 8.2, 6.1$  Hz, 3H), 6.29–6.01 (m, 2H), 5.77 (ddt,  $J = 17.3, 10.2, 7.5$  Hz, 1H), 5.24 (dd,  $J = 12.9, 5.7$  Hz, 2H), 4.48 (s, 1H), 2.65 (ddd,  $J = 61.1, 13.3, 7.4$  Hz, 2H).  $^{13}\text{C}$  NMR (125 MHz,  $\text{CDCl}_3$ )  $\delta$  179.59, 143.79, 139.61, 130.15, 129.93, 129.36, 129.09, 124.21, 123.96, 123.30, 121.51, 115.94, 110.73, 64.16, 44.70. MS (EI)  $m/z$ : 342  $[\text{M}^+]$ .

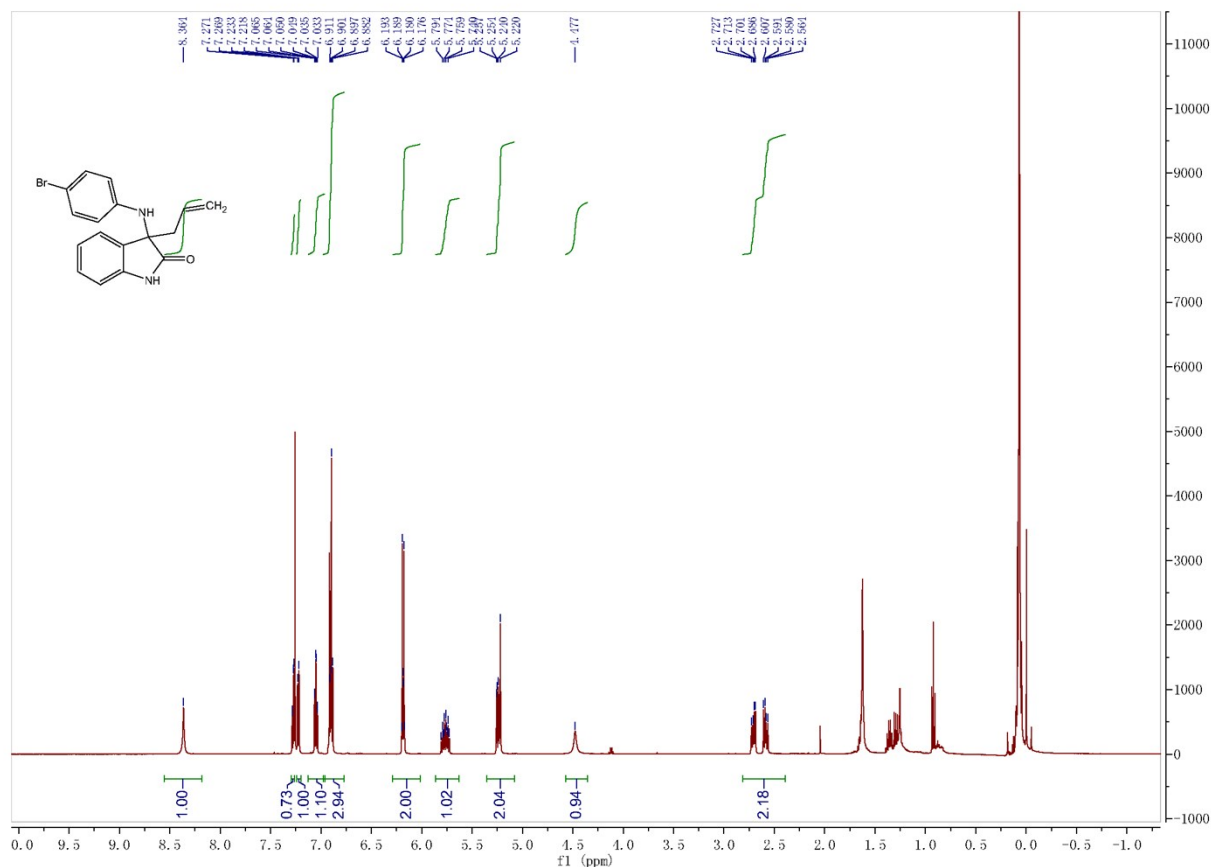

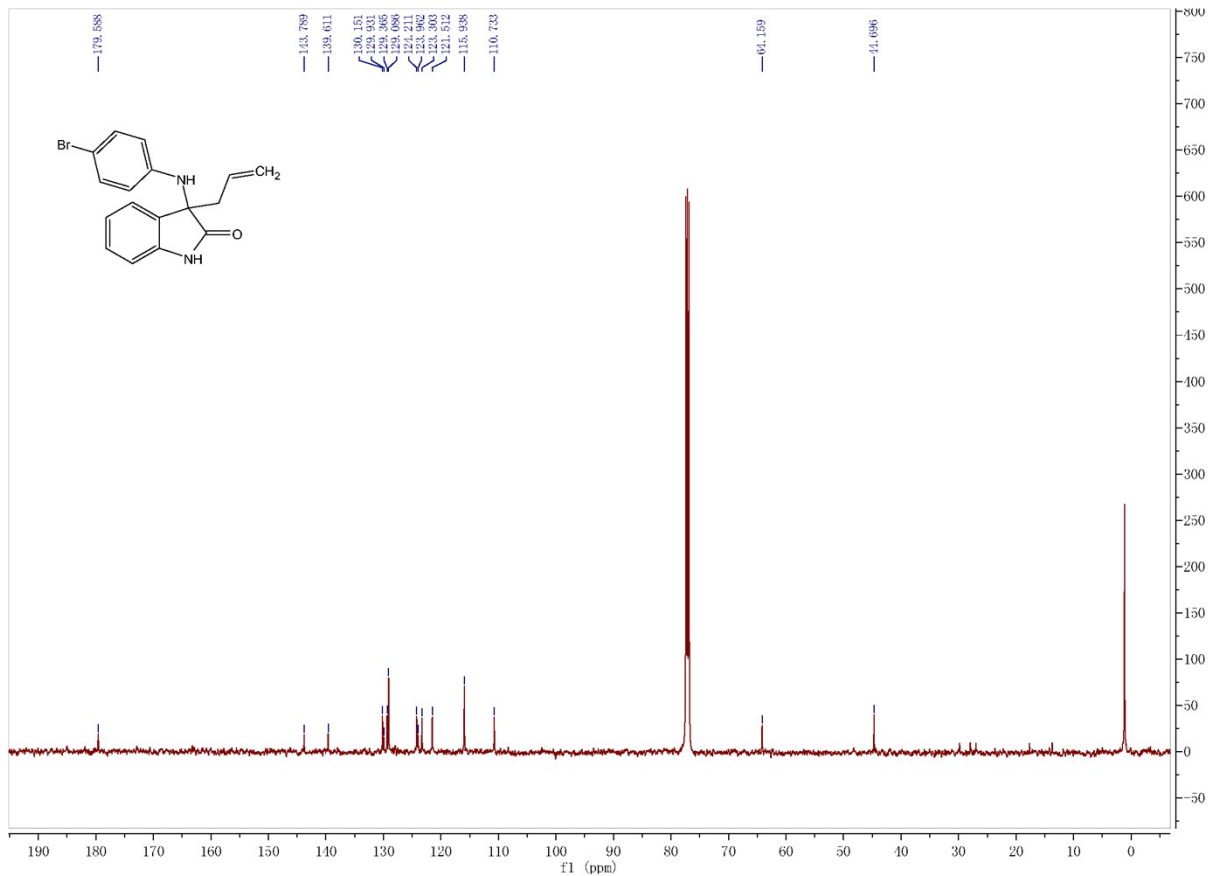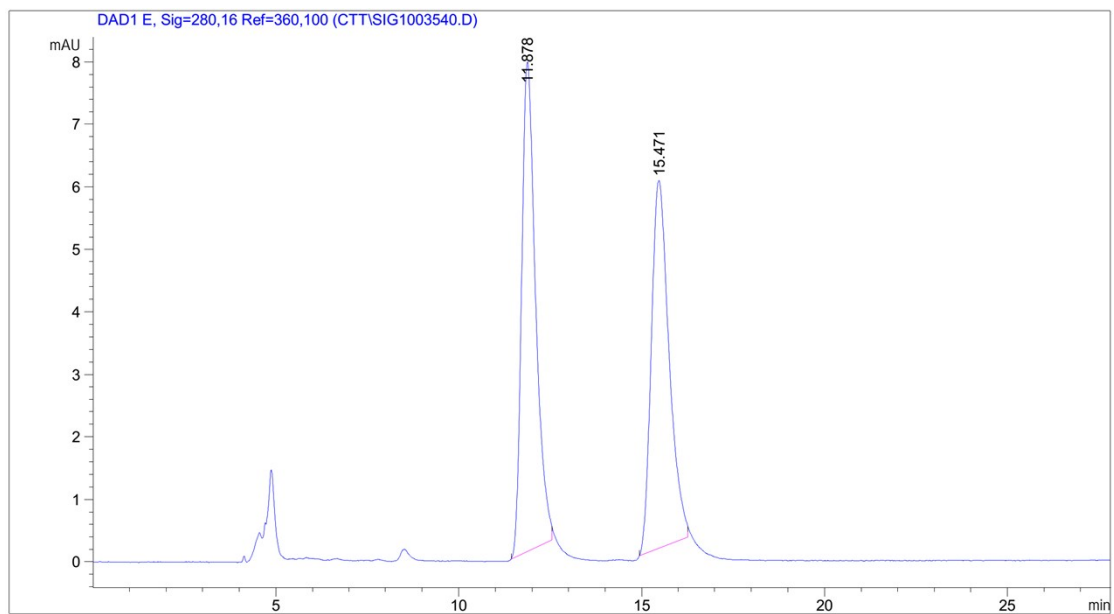

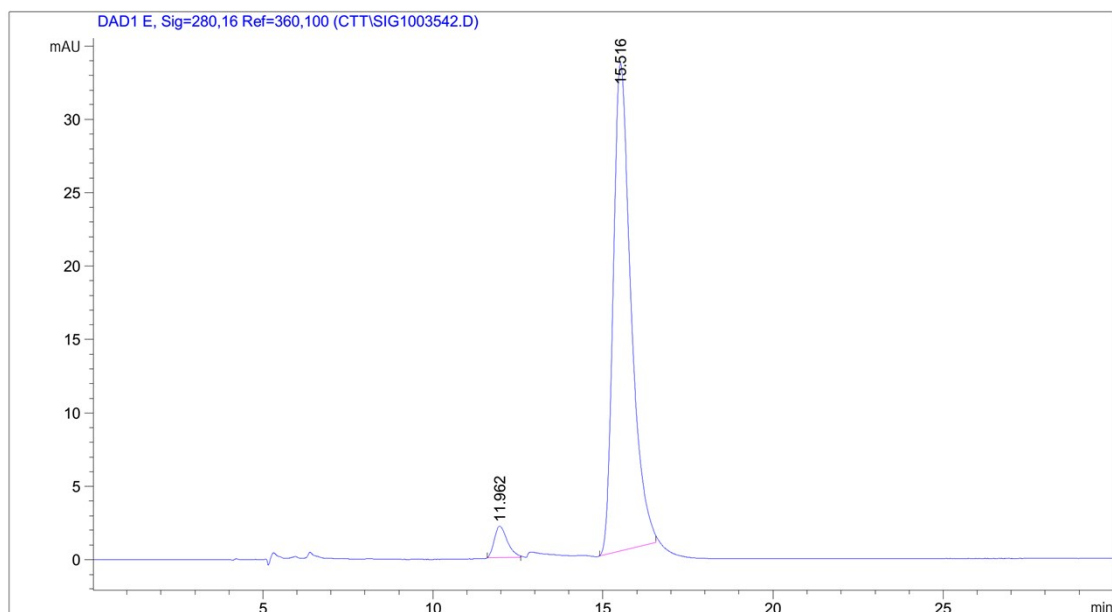

信号 1: DAD1 E, Sig=280,16 Ref=360,100

| 峰 # | 保留时间 [min] | 类型 | 峰宽 [min] | 峰面积 [mAU*s] | 峰高 [mAU] | 峰面积 %   |
|-----|------------|----|----------|-------------|----------|---------|
| 1   | 11.962     | BB | 0.4017   | 56.85746    | 2.14203  | 4.4940  |
| 2   | 15.516     | BB | 0.5484   | 1208.34241  | 33.21575 | 95.5060 |

### 2.6 3-allyl-3-(*m*-tolylamino)indolin-2-one (2g)

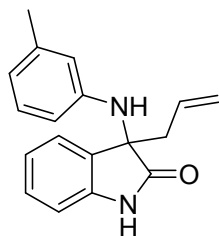

Chemical Formula: C<sub>18</sub>H<sub>18</sub>N<sub>2</sub>O  
Exact Mass: 278.14

Isolated as a colorless solid.  $[\alpha]_D^{25} = +62.5$  ( $c = 0.79$  in CH<sub>2</sub>Cl<sub>2</sub>). The *ee* (97%) was determined by HPLC analysis, Venusil CA column, Hexane/*i*-PrOH 80:20, flow rate=0.7 mL/min, UV= 280 nm, minor enantiomer  $t_1 = 8.0$  min, major enantiomer  $t_2 = 8.8$  min. <sup>1</sup>H NMR (500 MHz, CDCl<sub>3</sub>)  $\delta$  8.88 (s, 1H), 7.23 (td,  $J = 7.7, 1.1$  Hz, 1H), 7.17 (d,  $J = 7.3$  Hz, 1H), 7.04 – 6.97 (m, 2H), 6.88 (d,  $J = 7.8$  Hz, 1H), 6.70 (t,  $J = 7.7$  Hz, 1H), 6.56 (t,  $J = 7.1$  Hz, 1H), 5.93 (ddt,  $J = 17.4, 10.0, 7.5$  Hz, 1H), 5.77 (d,  $J = 7.8$  Hz, 1H), 5.33 (ddd,  $J = 13.6, 11.6, 1.4$  Hz, 2H), 4.38 (s, 1H), 2.69 (ddd,  $J = 64.9, 13.4, 7.5$  Hz, 2H), 2.25 (s, 3H). <sup>13</sup>C NMR (125 MHz, CDCl<sub>3</sub>)  $\delta$  180.69, 143.12, 139.69, 130.88, 130.57, 130.39, 129.04, 127.05, 123.91, 123.19, 123.09, 121.42, 118.40, 111.55, 110.90, 63.46, 45.05, 17.49. MS (EI)  $m/z$ : 278 [M<sup>+</sup>].

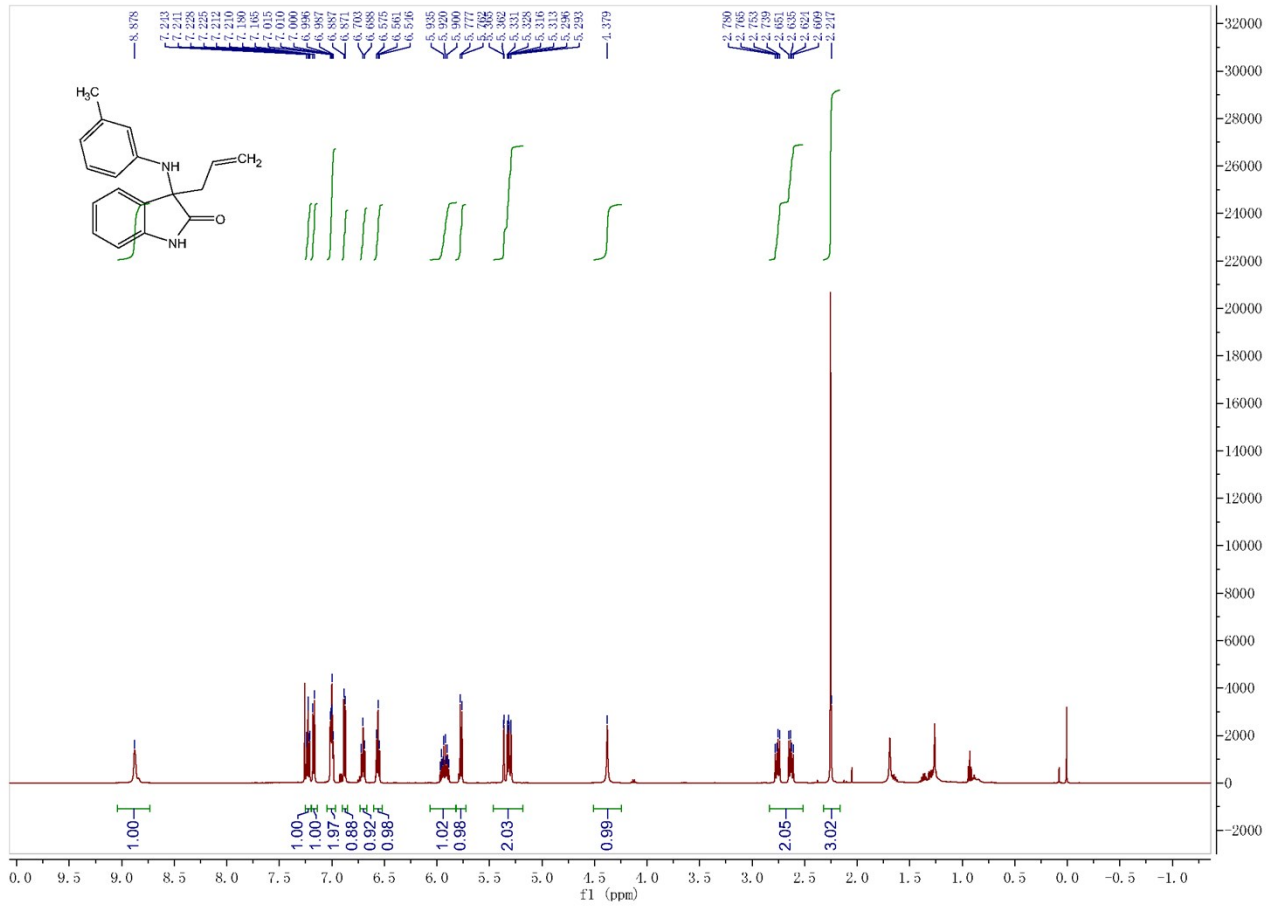

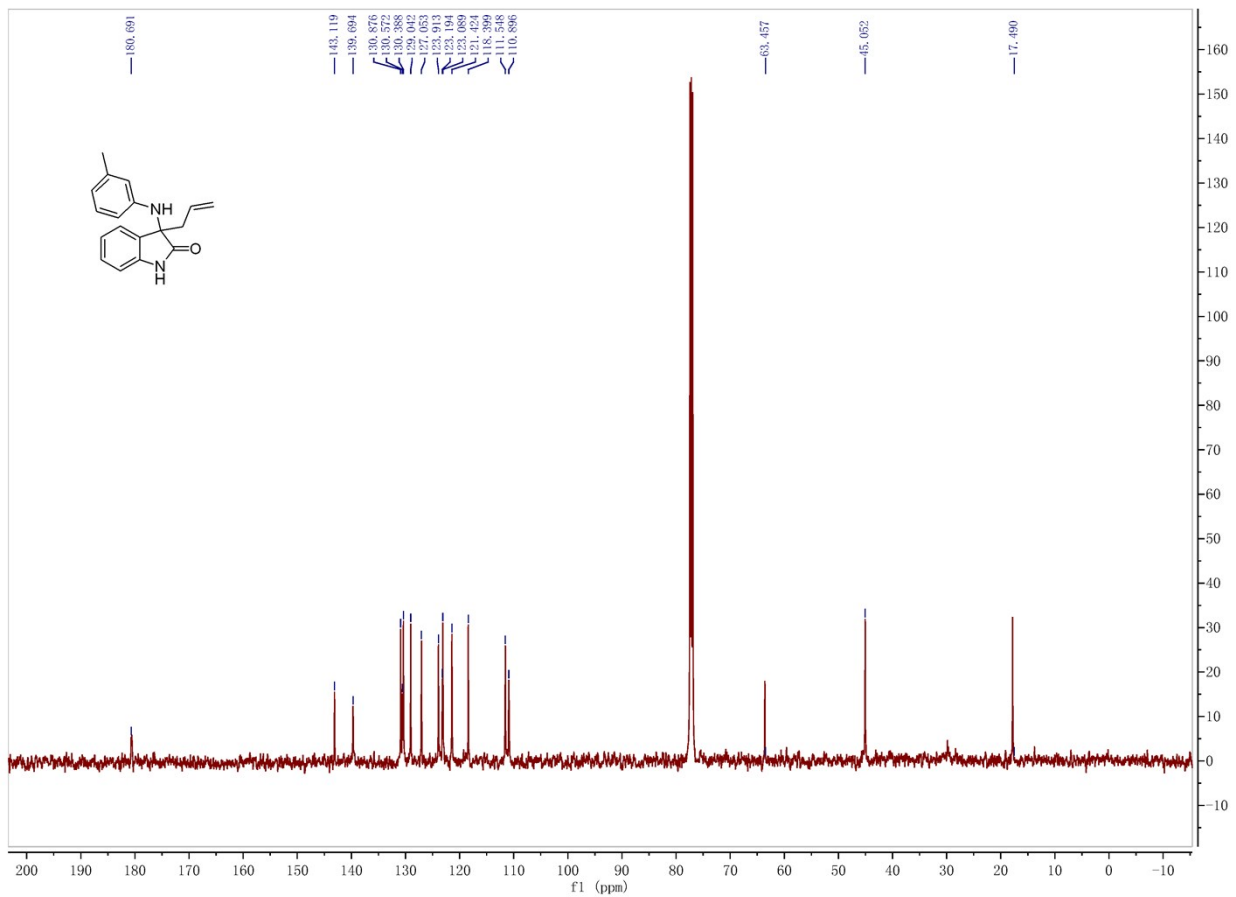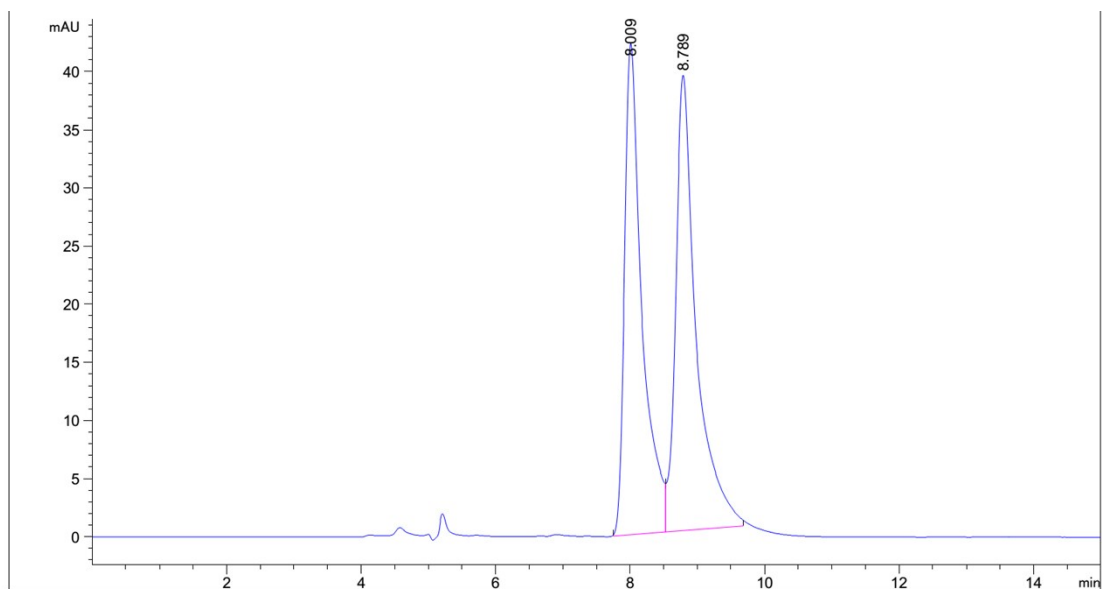



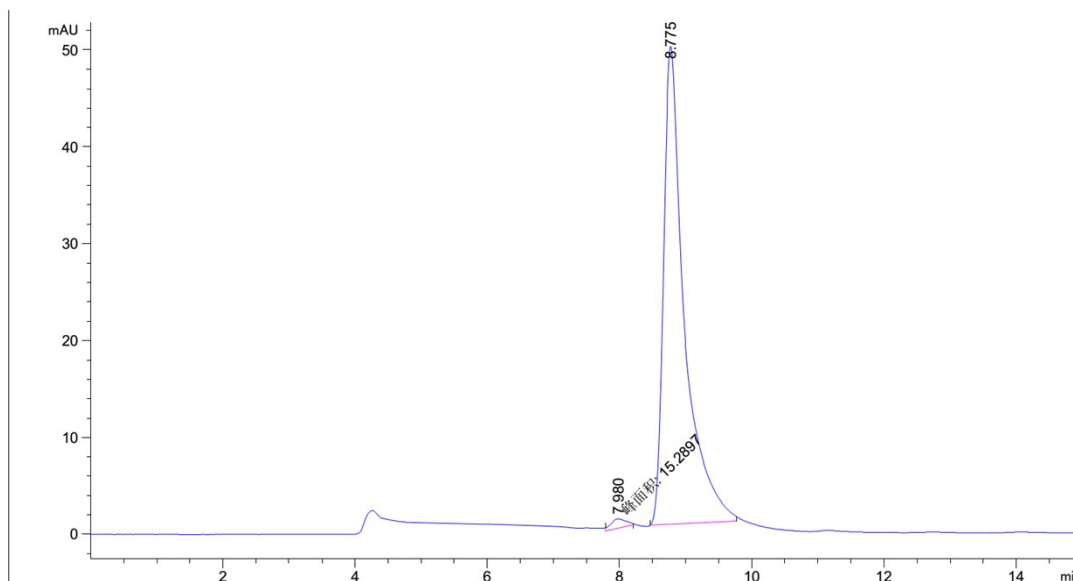

信号 1: DAD1 E, Sig=280,16 Ref=360,100

| 峰 # | 保留时间 [min] | 类型 | 峰宽 [min] | 峰面积 [mAU*s] | 峰高 [mAU]   | 峰面积 %   |
|-----|------------|----|----------|-------------|------------|---------|
| 1   | 7.980      | MM | 0.2650   | 15.28968    | 9.61651e-1 | 1.4013  |
| 2   | 8.775      | BB | 0.3145   | 1075.77979  | 49.30687   | 98.5987 |

2.7.3-allyl-3-(*o*-tolylamino)indolin-2-one (**2h**)

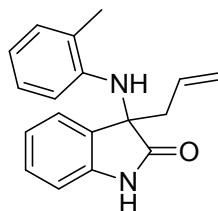

Chemical Formula: C<sub>18</sub>H<sub>18</sub>N<sub>2</sub>O  
Exact Mass: 278.14

f

Isolated as a colorless solid.  $[\alpha]_D^{25} = +106.4$  (c =0.55 in CH<sub>2</sub>Cl<sub>2</sub>). The *ee* (83%) was determined by HPLC analysis, Venusil CA column, Hexane/*i*-PrOH 80:20, flow rate=1.0 mL/min, UV= 280 nm, minor enantiomer  $t_1 = 17.8$  min, major enantiomer  $t_2 = 9.0$  min. <sup>1</sup>H NMR (500 MHz, CDCl<sub>3</sub>)  $\delta$  9.03 (s, 1H), 7.32 – 7.17 (m, 2H), 7.03 (t, *J* = 7.5 Hz, 1H), 6.93 – 6.86 (m, 1H), 6.82 (td, *J* = 7.8, 3.8 Hz, 1H), 6.47 (d, *J* = 7.4 Hz, 1H), 6.22 (s, 1H), 5.97 (d, *J* = 9.6 Hz, 1H), 5.77 (dddd, *J* = 17.3, 9.9, 7.5, 2.6 Hz, 1H), 5.37 – 5.03 (m, 2H), 4.50 (s, 1H), 2.66 (ddd, *J* = 65.8, 13.3, 7.4 Hz, 2H), 2.10 (s, 3H). <sup>13</sup>C NMR (125 MHz, CDCl<sub>3</sub>)  $\delta$  180.61, 145.21, 139.84, 138.85, 130.56, 130.42, 129.07, 124.14, 123.09, 121.22, 120.03, 115.91, 111.21, 110.75, 64.25, 44.79, 21.60. MS (EI) *m/z*: 278 [M<sup>+</sup>].

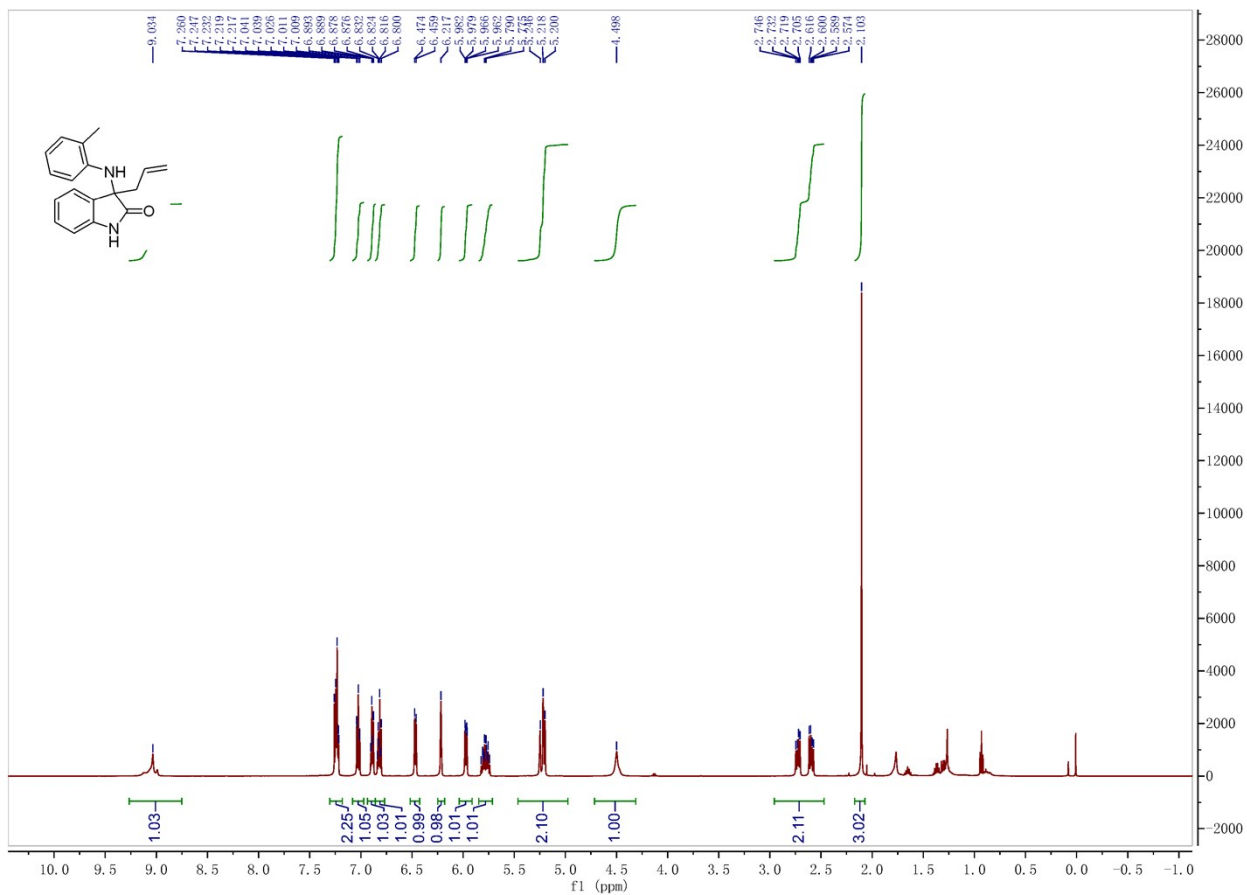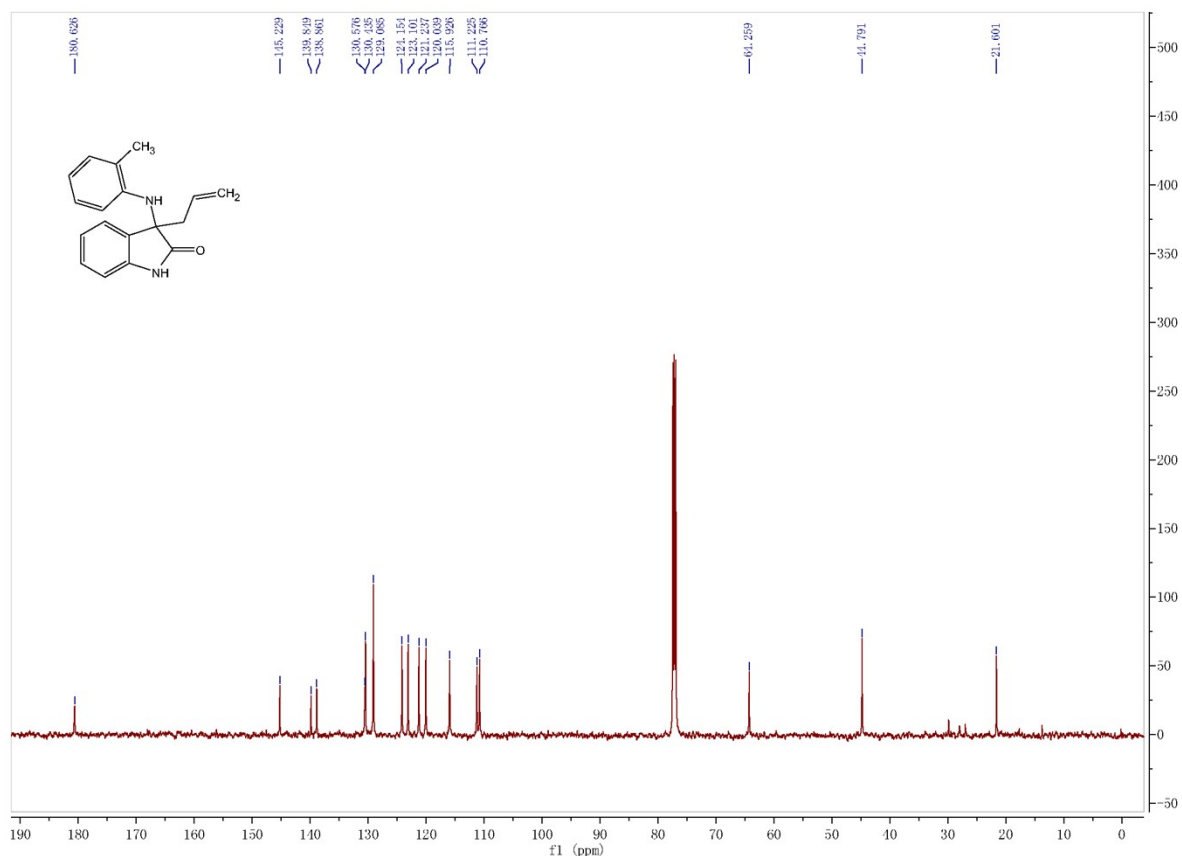

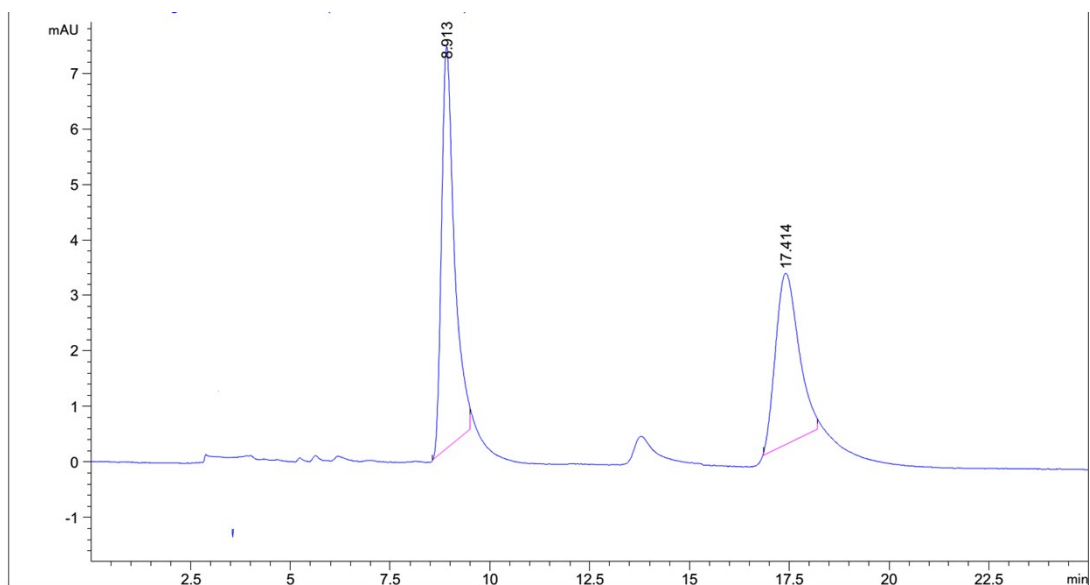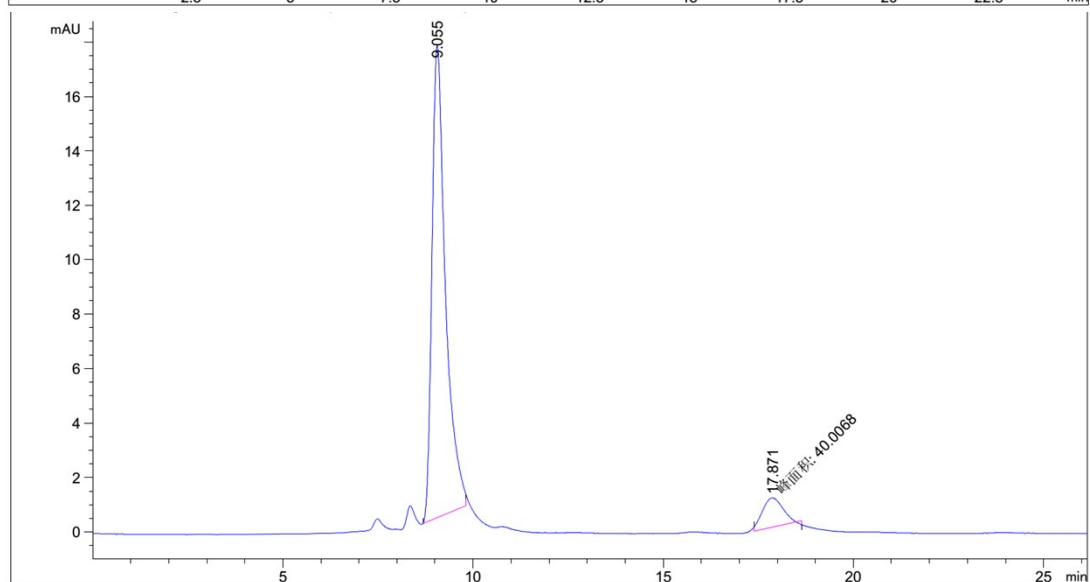

信号 1: DAD1 E, Sig=280,16 Ref=360,100

| 峰 # | 保留时间 [min] | 类型 | 峰宽 [min] | 峰面积 [mAU*s] | 峰高 [mAU] | 峰面积 %   |
|-----|------------|----|----------|-------------|----------|---------|
| 1   | 9.055      | BB | 0.3644   | 428.94345   | 17.35337 | 91.4689 |
| 2   | 17.871     | MM | 0.6210   | 40.00675    | 1.07376  | 8.5311  |

2.8 3-allyl-3-((4-methoxyphenyl)amino)-1-methylindolin-2-one (**2i**)

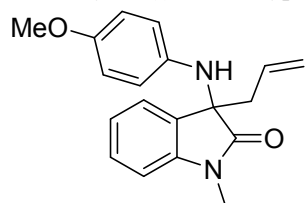

Chemical Formula: C<sub>19</sub>H<sub>20</sub>N<sub>2</sub>O<sub>2</sub>  
Exact Mass: 308.15

Isolated as a colorless solid.  $[\alpha]_D^{25} = +103.7$  (c = 0.60 in CH<sub>2</sub>Cl<sub>2</sub>). The *ee* (43%) was determined by

HPLC analysis, Venusil CA column, Hexane/*i*-PrOH 95:5, flow rate=0.5 mL/min, UV= 254 nm, minor enantiomer  $t_1 = 70.0$  min, major enantiomer  $t_2 = 61.9$  min.  $^1\text{H}$  NMR (500 MHz,  $\text{CDCl}_3$ )  $\delta$  7.32 (dt,  $J = 7.1, 3.8$  Hz, 2H), 7.08 (t,  $J = 7.5$  Hz, 1H), 6.86 (d,  $J = 8.0$  Hz, 1H), 6.53 (d,  $J = 8.8$  Hz, 2H), 6.23 (d,  $J = 8.8$  Hz, 2H), 5.78 – 5.58 (m, 1H), 5.16 (dd,  $J = 17.5, 13.9$  Hz, 2H), 4.12 (s, 1H), 3.63 (s, 3H), 3.19 (s, 3H), 2.63 (ddd,  $J = 66.2, 13.2, 7.4$  Hz, 2H).  $^{13}\text{C}$  NMR (125 MHz,  $\text{CDCl}_3$ )  $\delta$  178.00, 153.66, 143.10, 138.90, 130.68, 130.05, 129.12, 124.12, 123.02, 120.80, 118.04, 114.49, 108.54, 65.07, 55.56, 44.41, 26.38. MS (EI)  $m/z$ : 308  $[\text{M}^+]$ .

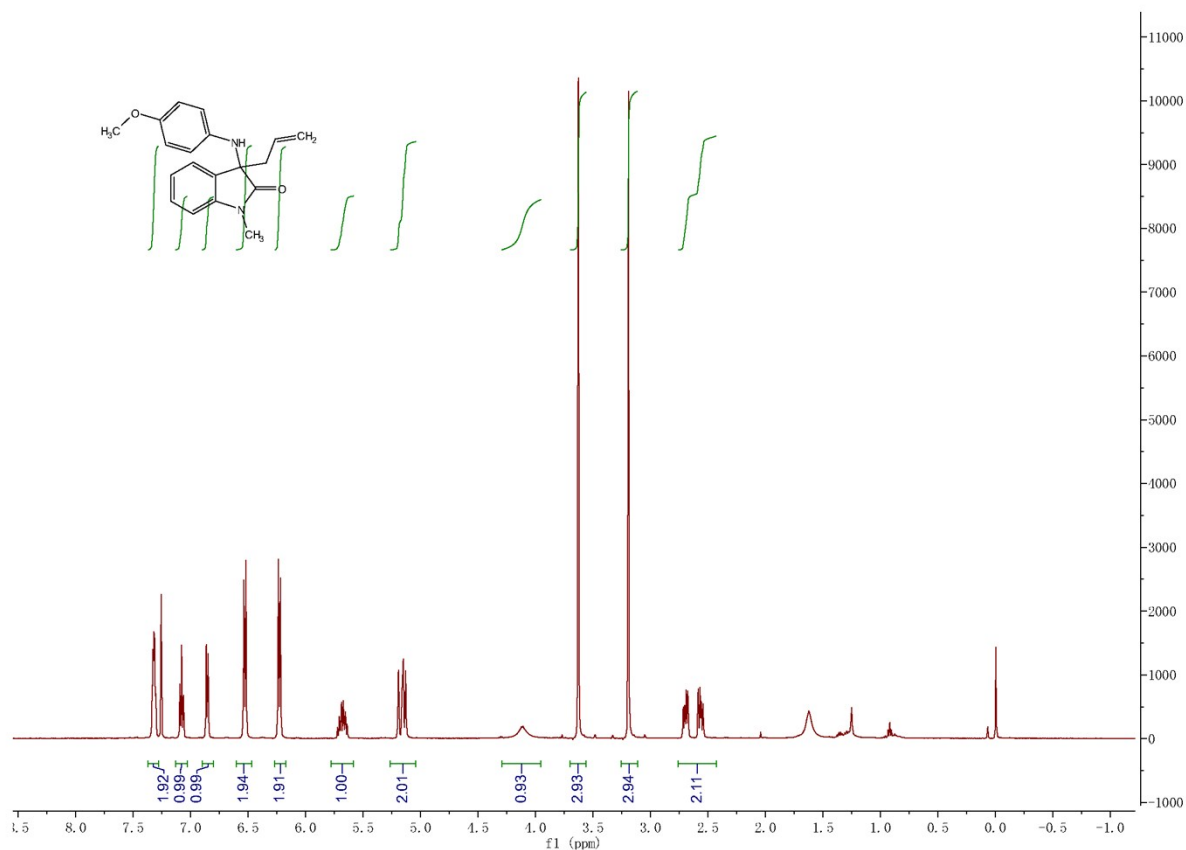

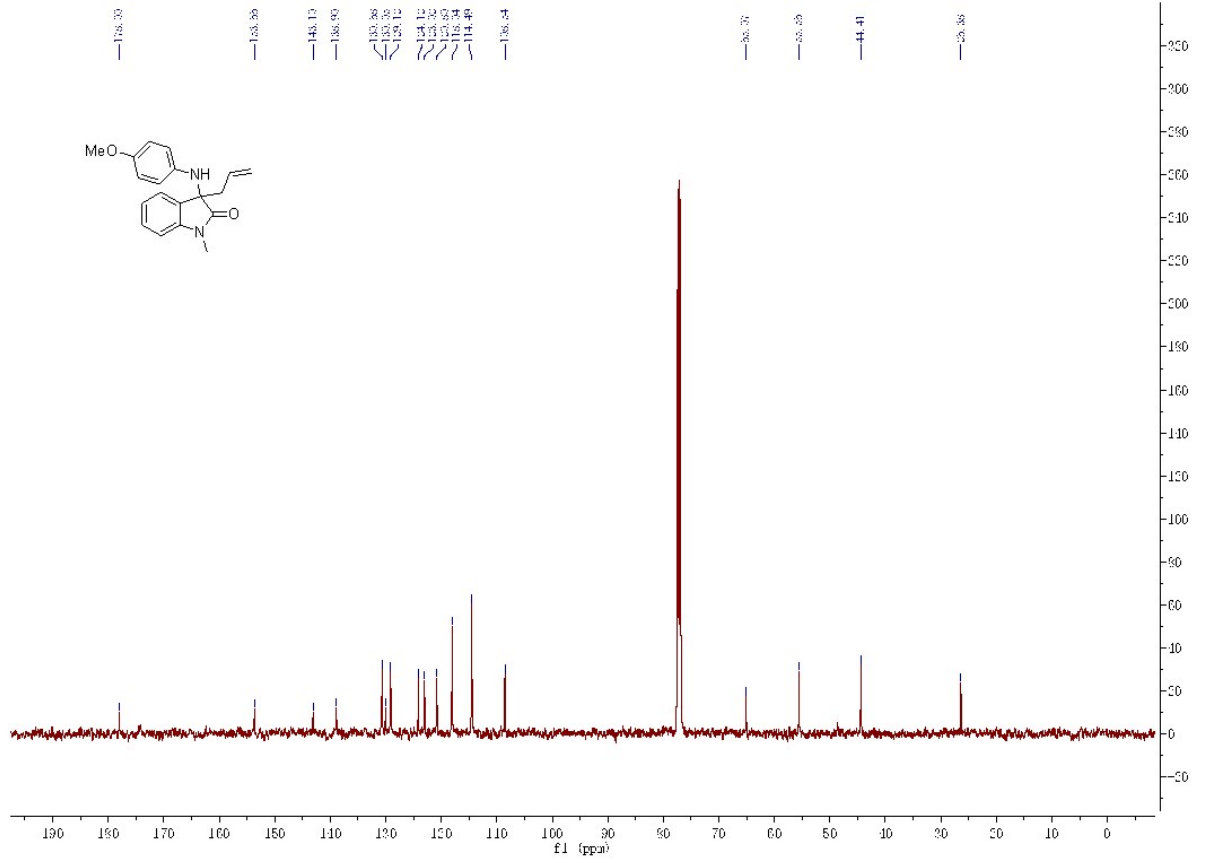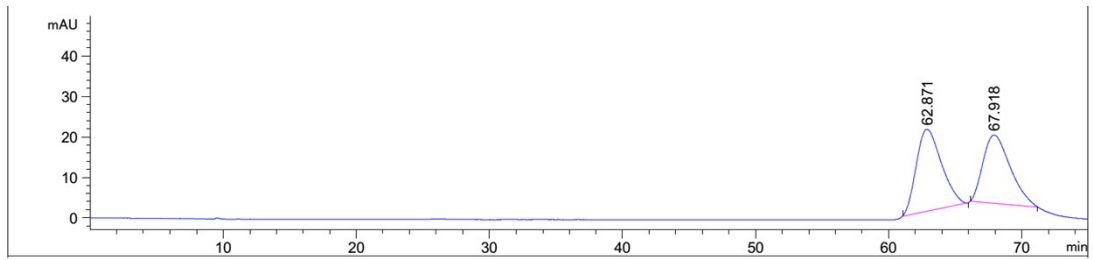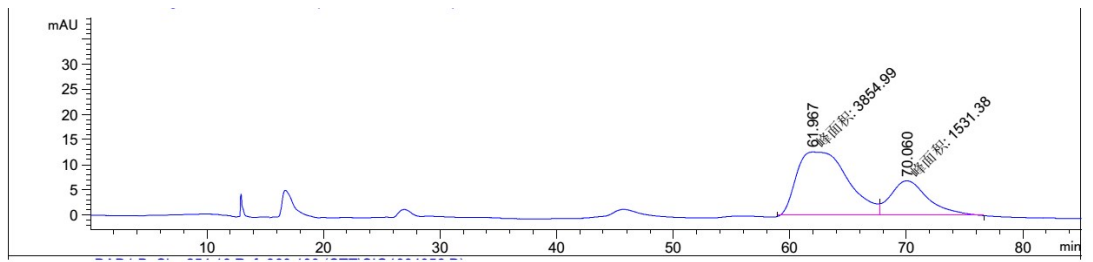

信号 1: DAD1 A, Sig=254,4 Ref=360,100

| 峰 # | 保留时间 [min] | 类型 | 峰宽 [min] | 峰面积 [mAU*s] | 峰高 [mAU] | 峰面积 %   |
|-----|------------|----|----------|-------------|----------|---------|
| 1   | 61.967     | MF | 5.0990   | 3854.99023  | 12.60041 | 71.5693 |
| 2   | 70.060     | FM | 3.7098   | 1531.38123  | 6.87986  | 28.4307 |

2.9 3-allyl-3-((4-methoxyphenyl)amino)-1-phenylindolin-2-one (2j)

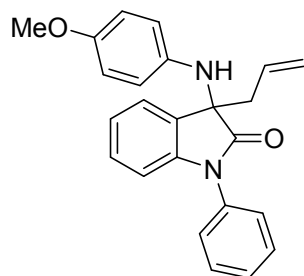

Chemical Formula: C<sub>24</sub>H<sub>22</sub>N<sub>2</sub>O<sub>2</sub>  
Exact Mass: 370.17

Isolated as a colorless solid.  $[\alpha]_D^{25} = +113.2$  (c = 0.75 in CH<sub>2</sub>Cl<sub>2</sub>). The *ee* (63%) was determined by HPLC analysis, Venusil CO column, Hexane/*i*-PrOH 65:35, flow rate = 0.7 mL/min, UV = 254 nm, minor enantiomer  $t_1 = 5.2$  min, major enantiomer  $t_2 = 4.7$  min. <sup>1</sup>H NMR (500 MHz, CDCl<sub>3</sub>)  $\delta$  7.54 (t, *J* = 7.7 Hz, 2H), 7.49 (d, *J* = 7.3 Hz, 1H), 7.44 (t, *J* = 7.5 Hz, 1H), 7.32 – 7.26 (m, 3H), 7.19 (t, *J* = 7.4 Hz, 1H), 6.85 (d, *J* = 7.9 Hz, 1H), 6.70 – 6.39 (m, 4H), 5.78 (td, *J* = 16.9, 8.0 Hz, 1H), 5.26 (dd, *J* = 22.4, 13.6 Hz, 2H), 4.25 (s, 1H), 3.72 (s, 3H), 2.84 (ddd, *J* = 21.3, 13.1, 7.4 Hz, 2H). <sup>13</sup>C NMR (125 MHz, CDCl<sub>3</sub>)  $\delta$  177.40, 143.35, 138.82, 134.47, 130.58, 129.73, 129.06, 128.27, 126.65, 124.49, 123.47, 120.92, 118.93, 114.46, 109.78, 65.54, 55.62, 44.40. MS (EI) *m/z*: 370 [M<sup>+</sup>].

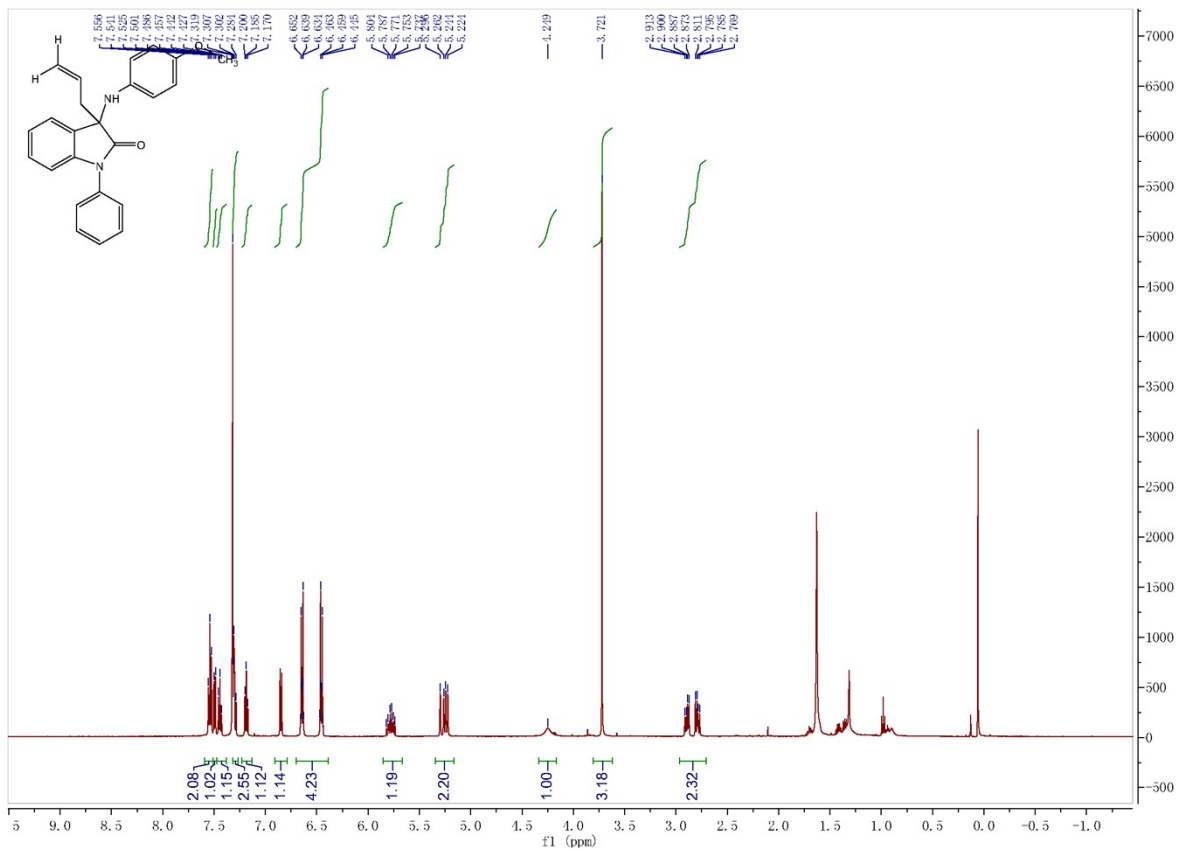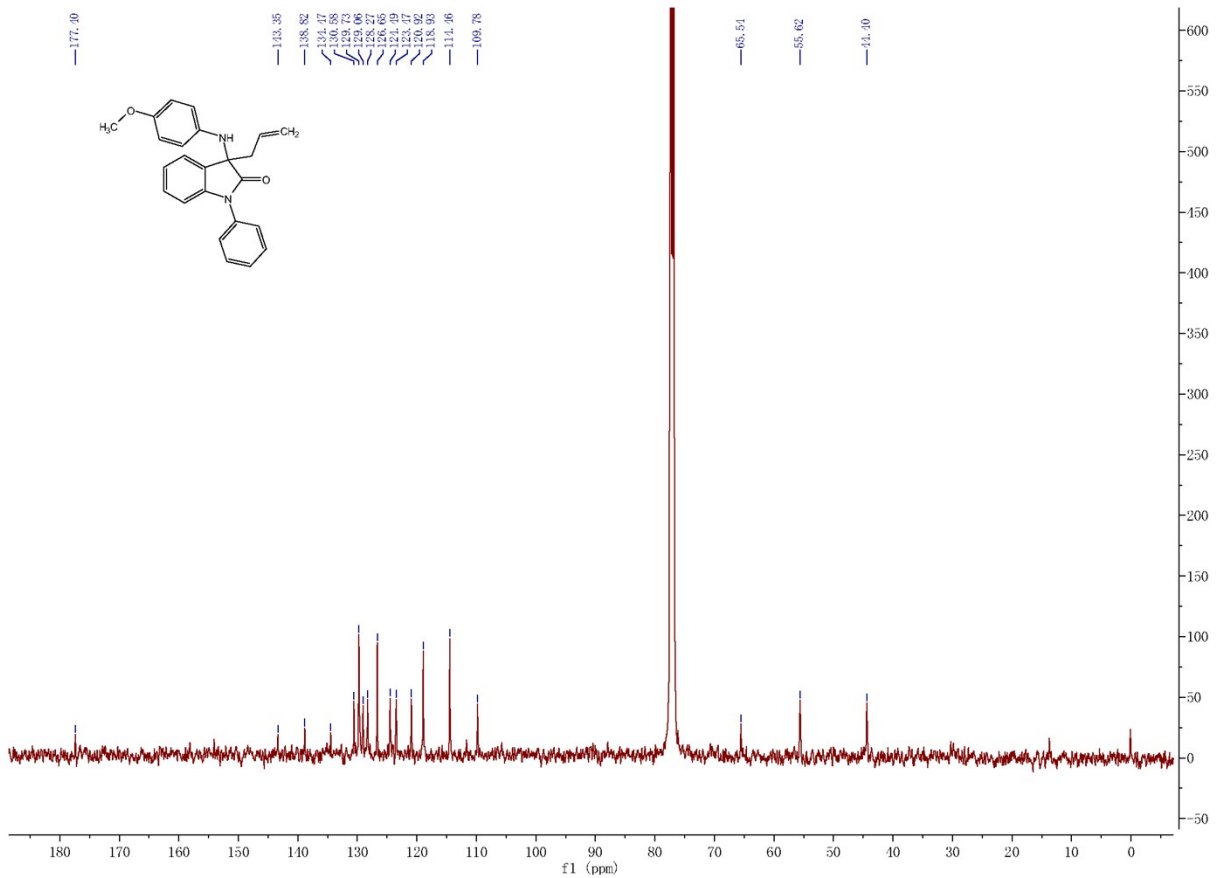

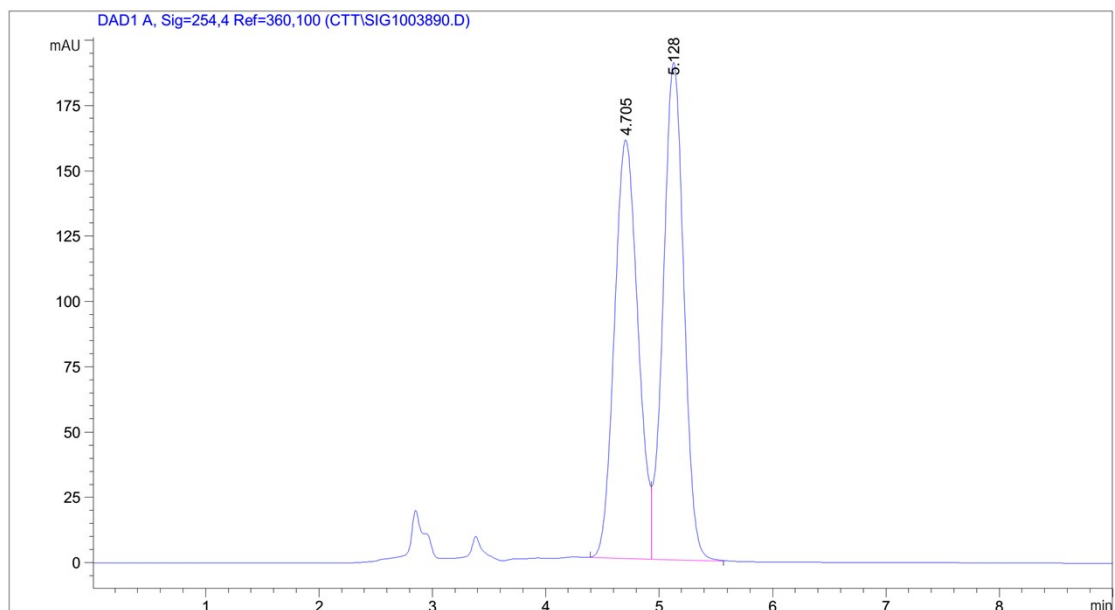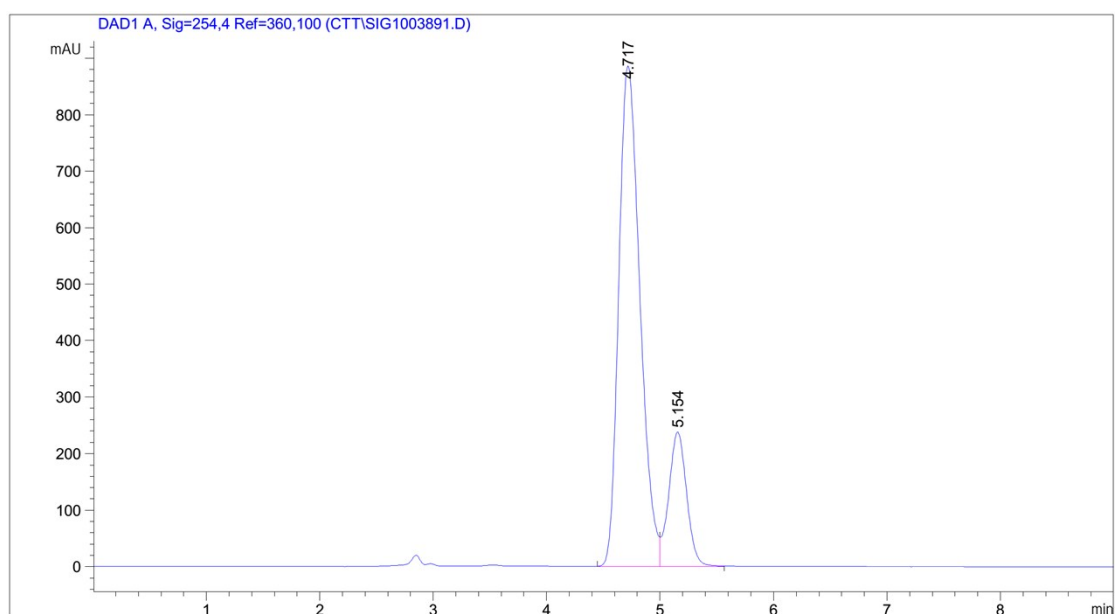

信号 1: DAD1 A, Sig=254,4 Ref=360,100

| 峰 # | 保留时间 [min] | 类型 | 峰宽 [min] | 峰面积 [mAU*s] | 峰高 [mAU]  | 峰面积 %   |
|-----|------------|----|----------|-------------|-----------|---------|
| 1   | 4.717      | BV | 0.2013   | 1.14909e4   | 886.35156 | 81.4924 |
| 2   | 5.154      | VB | 0.1680   | 2609.67896  | 237.86870 | 18.5076 |

2.10 3-allyl-1-benzyl-3-((4-methoxyphenyl)amino)indolin-2-one (2k)



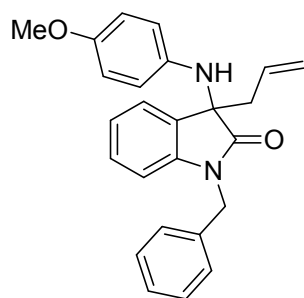

Chemical Formula:  $C_{25}H_{24}N_2O_2$   
Exact Mass: 384.18

Isolated as a colorless solid.  $[\alpha]_D^{25} = +97.6$  ( $c = 0.68$  in  $CH_2Cl_2$ ). The ee (74%) was determined by HPLC analysis, Venusil CA column, Hexane/*i*-PrOH 85:15, flow rate=1.0 mL/min, UV= 280 nm, minor enantiomer  $t_1 = 21.0$  min, major enantiomer  $t_2 = 28.2$  min.  $^1H$  NMR (500 MHz,  $CDCl_3$ )  $\delta$  7.46 (d,  $J = 7.3$  Hz, 1H), 7.30 – 7.20 (m, 4H), 7.20 – 7.00 (m, 3H), 6.73 (d,  $J = 7.8$  Hz, 1H), 6.48 (dd,  $J = 98.0, 8.7$  Hz, 4H), 5.77 (td,  $J = 17.3, 8.1$  Hz, 1H), 5.23 (dd,  $J = 29.8, 13.6$  Hz, 2H), 5.10 (d,  $J = 15.6$  Hz, 1H), 4.71 (d,  $J = 15.7$  Hz, 1H), 4.17 (s, 1H), 3.73 (s, 3H), 2.77 (ddd,  $J = 21.4, 13.2, 7.4$  Hz, 2H).  $^{13}C$  NMR (125 MHz,  $CDCl_3$ )  $\delta$  177.84, 142.41, 138.64, 135.57, 130.78, 129.96, 129.08, 128.70, 127.64, 127.47, 124.37, 122.97, 120.79, 119.99, 114.38, 109.68, 77.00, 65.79, 55.52, 44.23, 43.92. MS (EI)  $m/z$ : 384  $[M]^+$ .

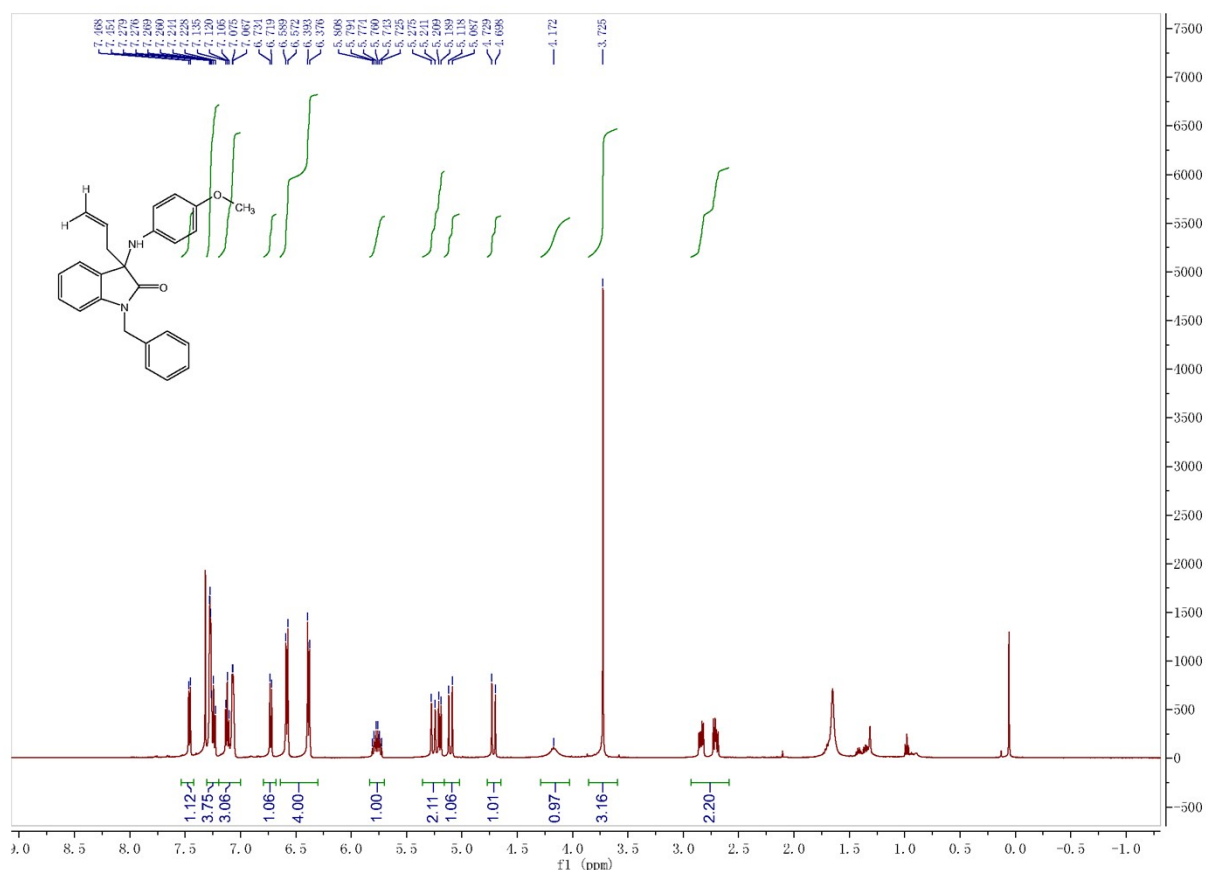

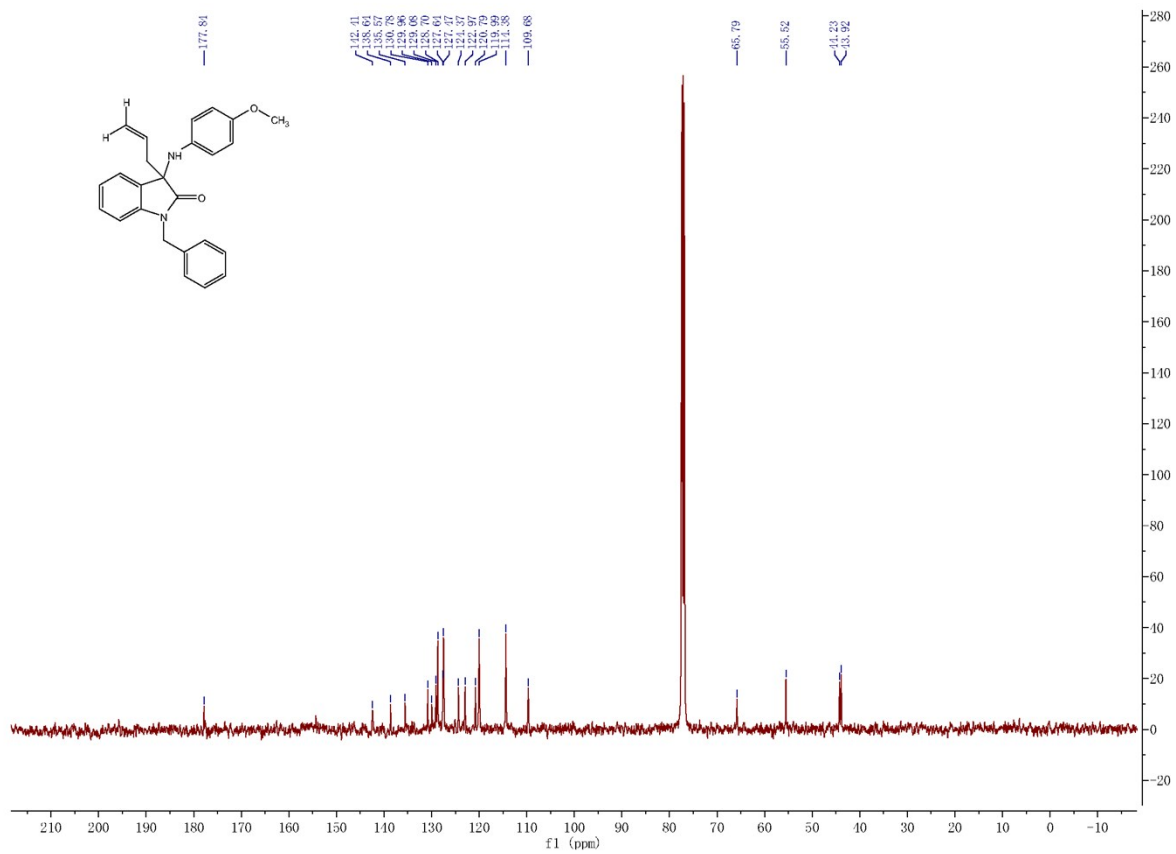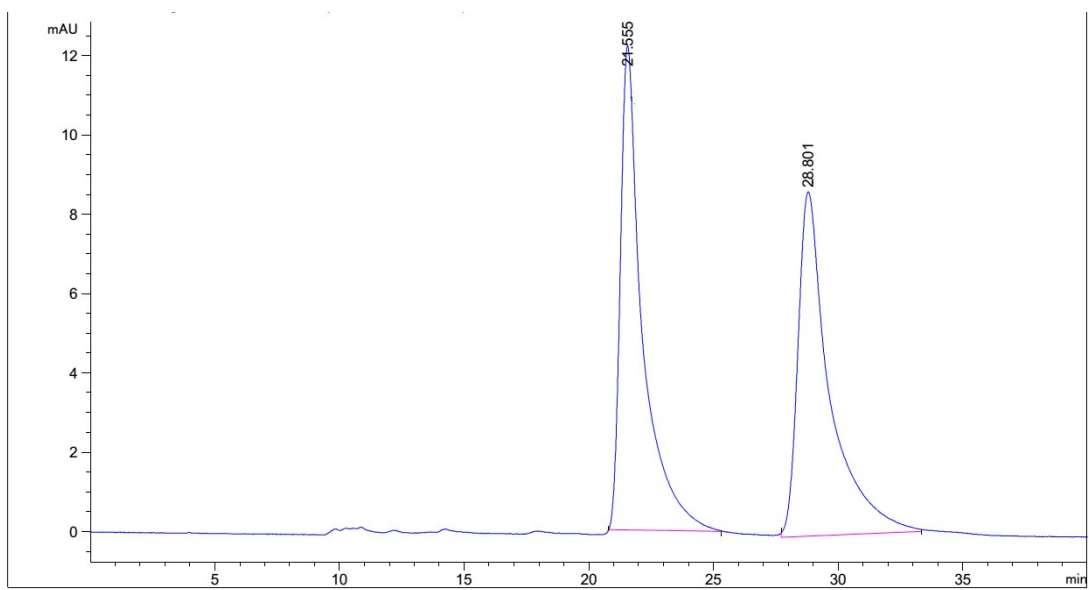

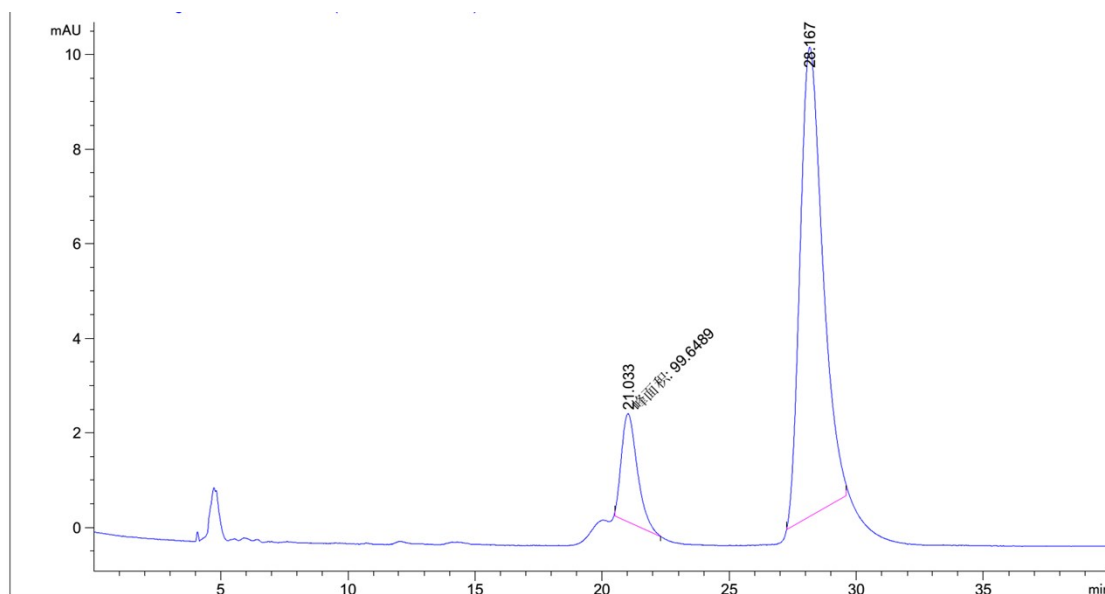

信号 1: DAD1 E, Sig=280,16 Ref=360,100

| 峰 # | 保留时间 [min] | 类型 | 峰宽 [min] | 峰面积 [mAU*s] | 峰高 [mAU] | 峰面积 %   |
|-----|------------|----|----------|-------------|----------|---------|
| 1   | 21.027     | MM | 0.7710   | 112.82544   | 2.43887  | 13.1001 |
| 2   | 28.167     | MM | 1.1903   | 748.42957   | 10.47948 | 86.8999 |

2.11 3-allyl-3-((4-methoxyphenyl)amino)-5-methylindolin-2-one (2I)

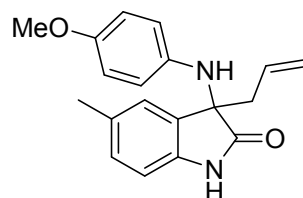

Chemical Formula: C<sub>19</sub>H<sub>20</sub>N<sub>2</sub>O<sub>2</sub>  
Exact Mass: 308.15

Isolated as a white solid.  $[\alpha]_D^{25} = +59.3$  (c=0.84 in CH<sub>2</sub>Cl<sub>2</sub>). The ee (60%) was determined by HPLC analysis, Venusil CA column, Hexane/i-PrOH 80:10, flow rate=0.7 mL/min, UV= 280 nm, minor enantiomer t<sub>1</sub> = 13.3 min, major enantiomer t<sub>2</sub>= 14.8 min. <sup>1</sup>H NMR (500 MHz, CDCl<sub>3</sub>) δ 9.01 (s, 1H), 6.96 (d, J = 7.9 Hz, 1H), 6.80 – 6.55 (m, 2H), 6.46 (d, J = 8.9 Hz, 2H), 6.23 (d, J = 8.9 Hz, 2H), 5.67 (dt, J = 17.5, 8.8 Hz, 1H), 5.13 (dd, J = 19.2, 13.6 Hz, 2H), 4.25 (s, 1H), 3.53 (s, 3H), 2.59 (ddd, J = 63.1, 13.3, 7.4 Hz, 2H), 2.24 (s, 3H). <sup>13</sup>C NMR (126 MHz, CDCl<sub>3</sub>) δ 180.87, 153.32, 139.15, 137.63, 132.53, 130.66, 129.42, 124.91, 120.90, 117.17, 114.57, 110.50, 65.32, 55.50, 44.56, 21.32. MS (EI) m/z: 308 [M<sup>+</sup>].

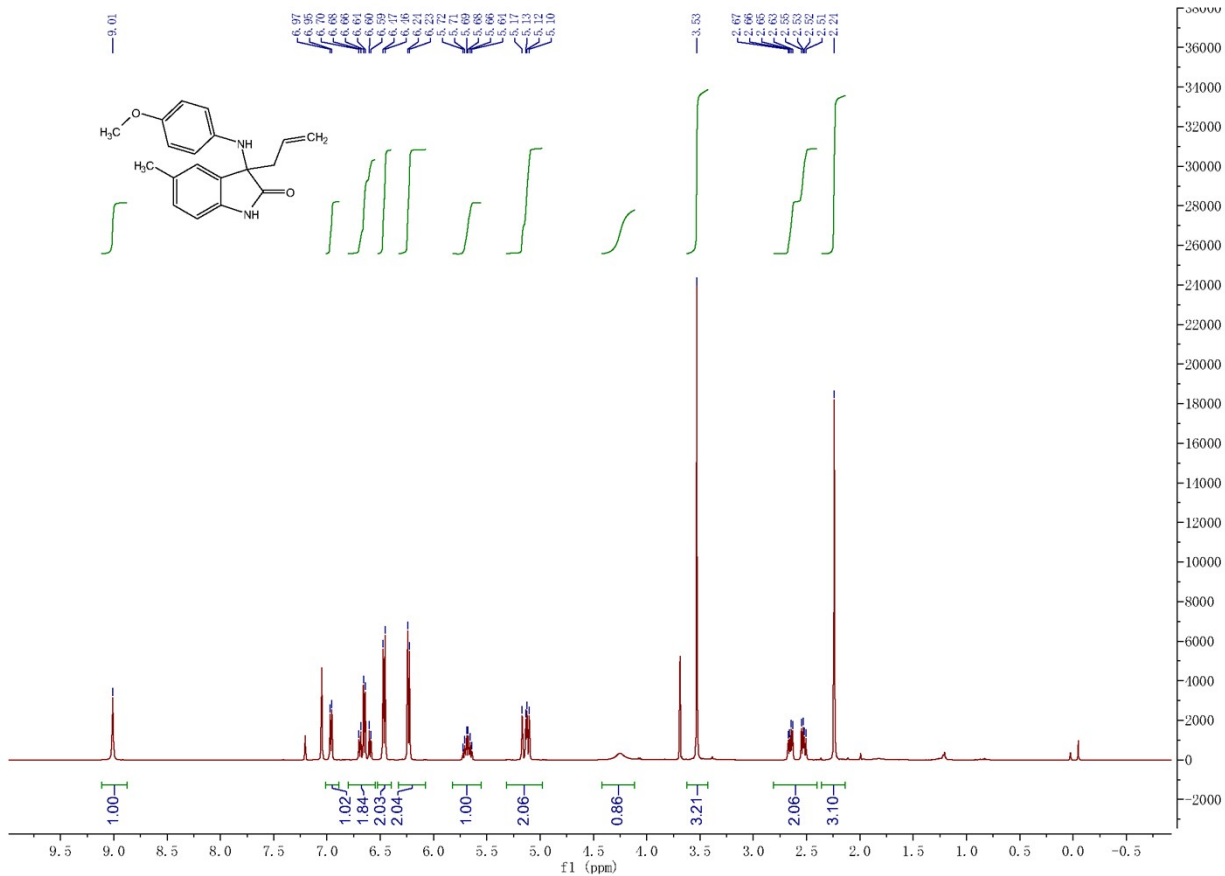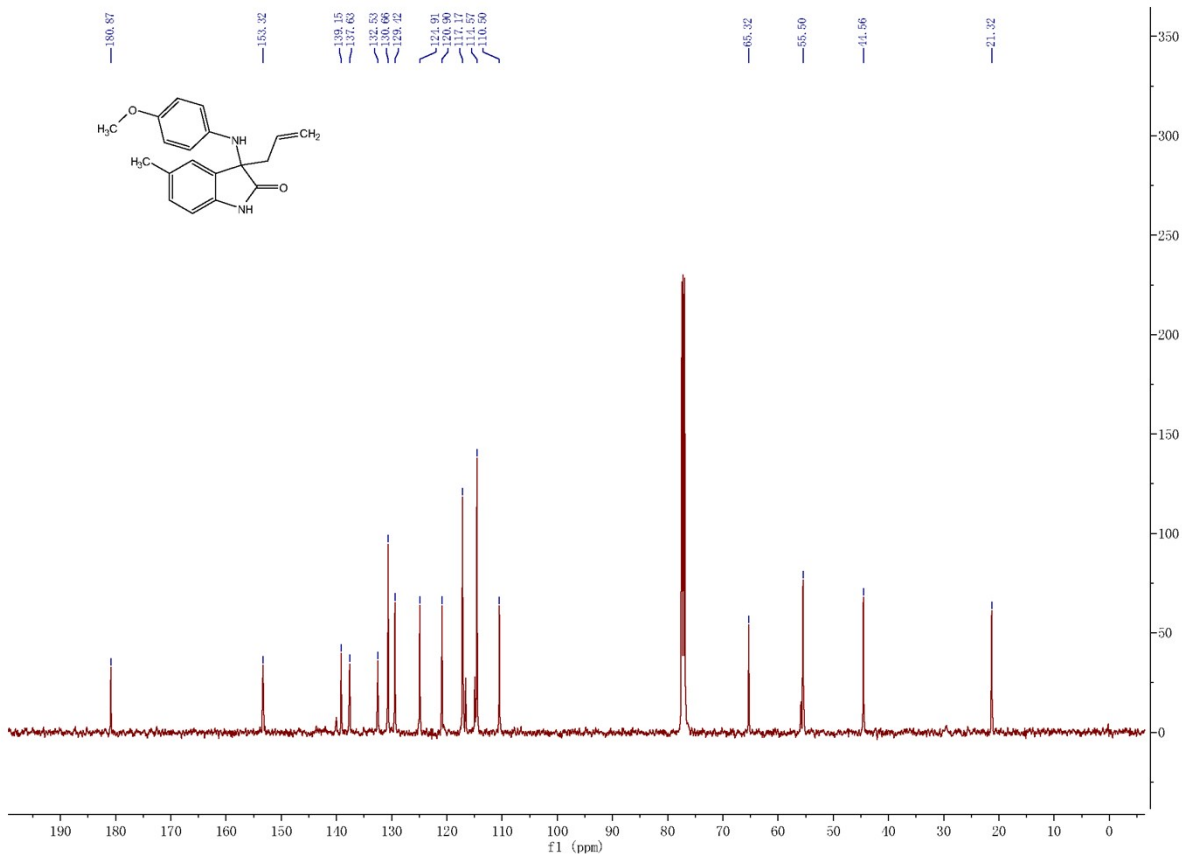

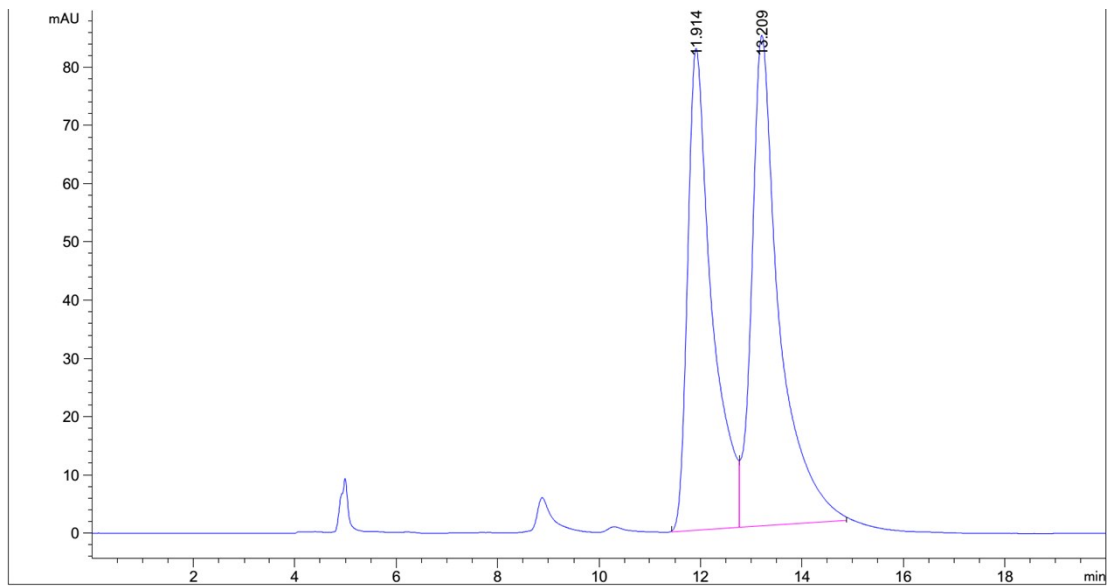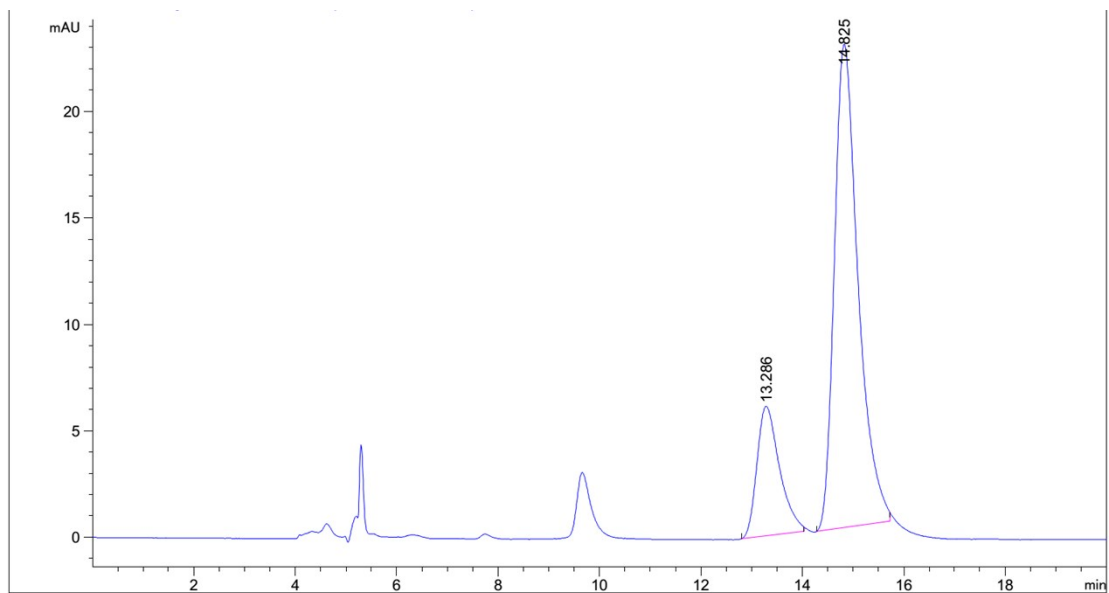

信号 1: DAD1 E, Sig=280,16 Ref=360,100

| 峰 # | 保留时间 [min] | 类型 | 峰宽 [min] | 峰面积 [mAU*s] | 峰高 [mAU] | 峰面积 %   |
|-----|------------|----|----------|-------------|----------|---------|
| 1   | 13.286     | BB | 0.4587   | 188.15355   | 6.08632  | 19.6725 |
| 2   | 14.825     | MM | 0.5579   | 768.27759   | 22.94965 | 80.3275 |

2.12 3-allyl-5-methoxy-3-((4-methoxyphenyl)amino)indolin-2-one (2m)

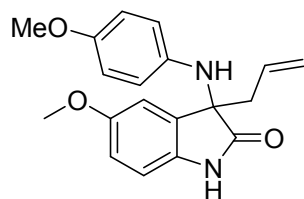

Chemical Formula: C<sub>19</sub>H<sub>20</sub>N<sub>2</sub>O<sub>3</sub>  
 Exact Mass: 324.15

Isolated as a white solid.  $[\alpha]_D^{25} = +73.2$  ( $c = 0.88$  in CH<sub>2</sub>Cl<sub>2</sub>). The ee (71%) was determined by HPLC analysis, Venusil CA column, Hexane/*i*-PrOH 80:20, flow rate=0.7 mL/min, UV= 280 nm, minor enantiomer  $t_r = 20.4$  min, major enantiomer  $t_r = 23.7$  min. <sup>1</sup>H NMR (500 MHz, CDCl<sub>3</sub>)  $\delta$  7.86 (s, 1H), 6.97 (d,  $J = 2.1$  Hz, 1H), 6.92 – 6.72 (m, 2H), 6.74 – 6.51 (m, 2H), 6.51 – 6.21 (m, 2H), 5.80 (td,  $J = 17.0, 8.9$  Hz, 1H), 5.26 (t,  $J = 14.5$  Hz, 2H), 4.20 (s, 1H), 3.83 (s, 3H), 3.69 (s, 3H), 2.70 (ddd,  $J = 21.4, 13.3, 7.4$  Hz, 2H). <sup>13</sup>C NMR (126 MHz, CDCl<sub>3</sub>)  $\delta$  179.82, 156.28, 138.92, 133.16, 132.00, 130.47, 121.04, 117.74, 114.57, 113.93, 111.11, 110.88, 65.68, 55.86, 55.57, 44.57. MS (EI)  $m/z$ : 324 [M<sup>+</sup>].

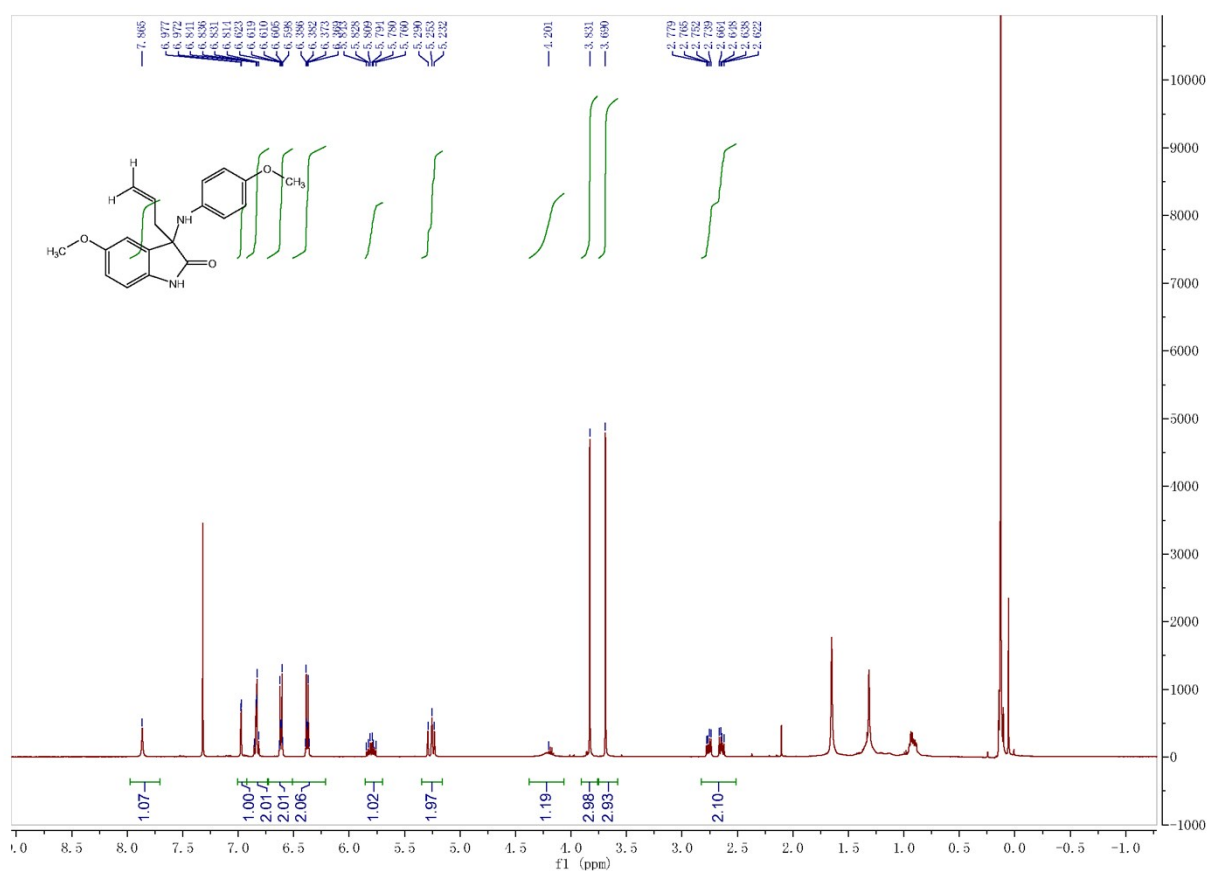

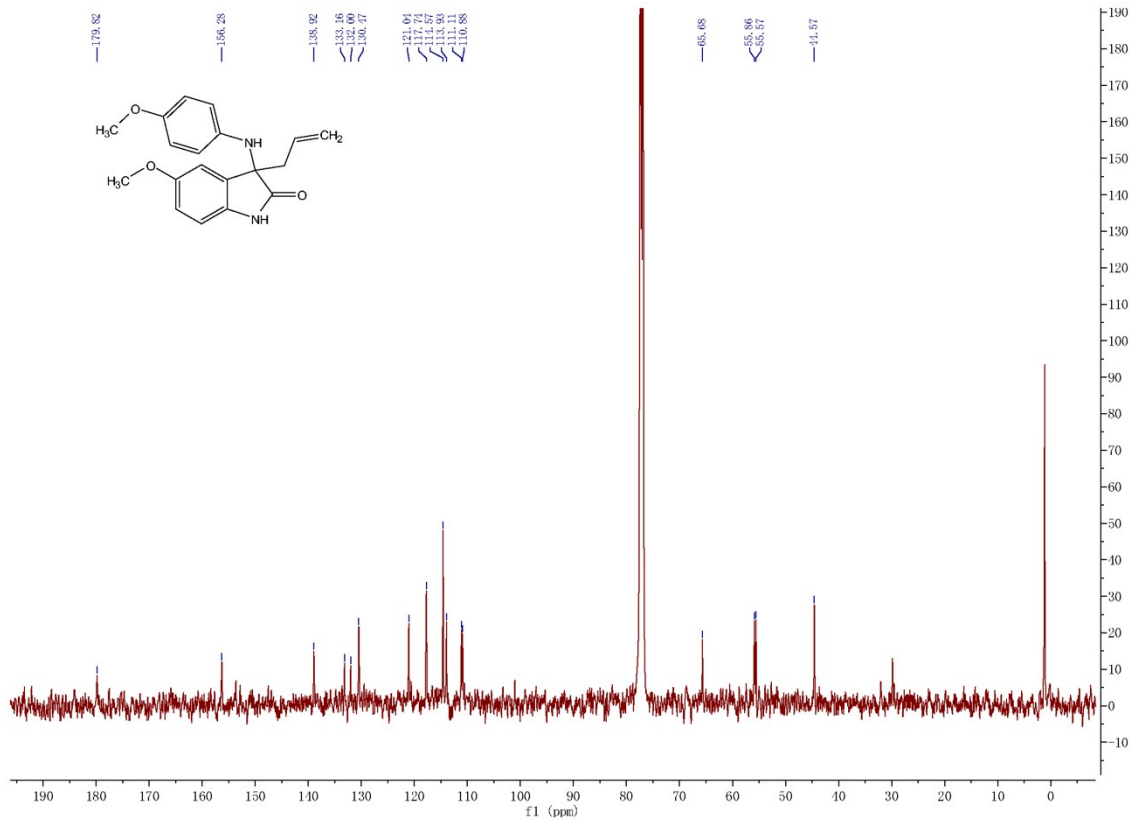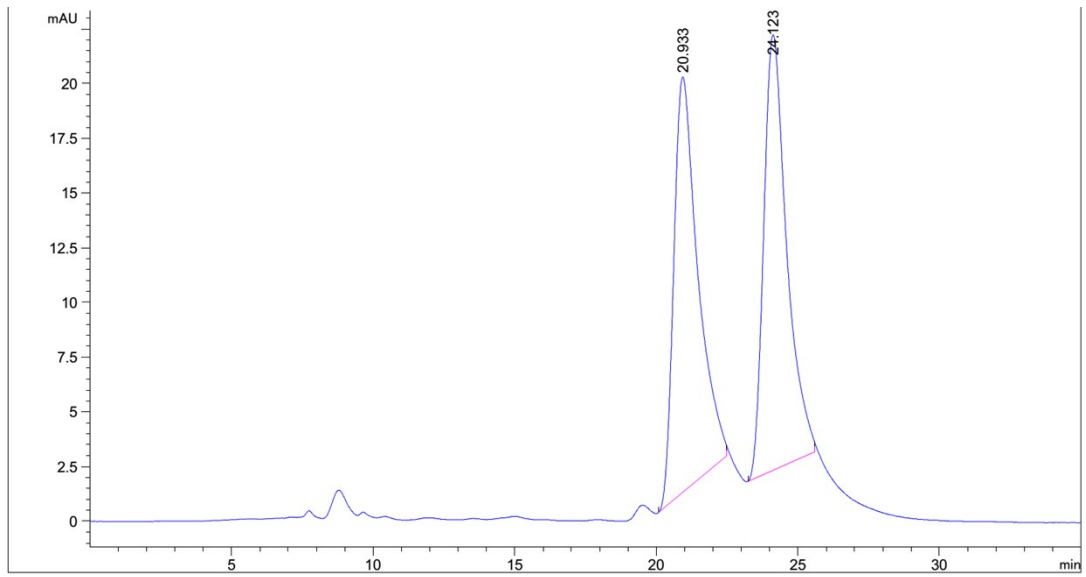

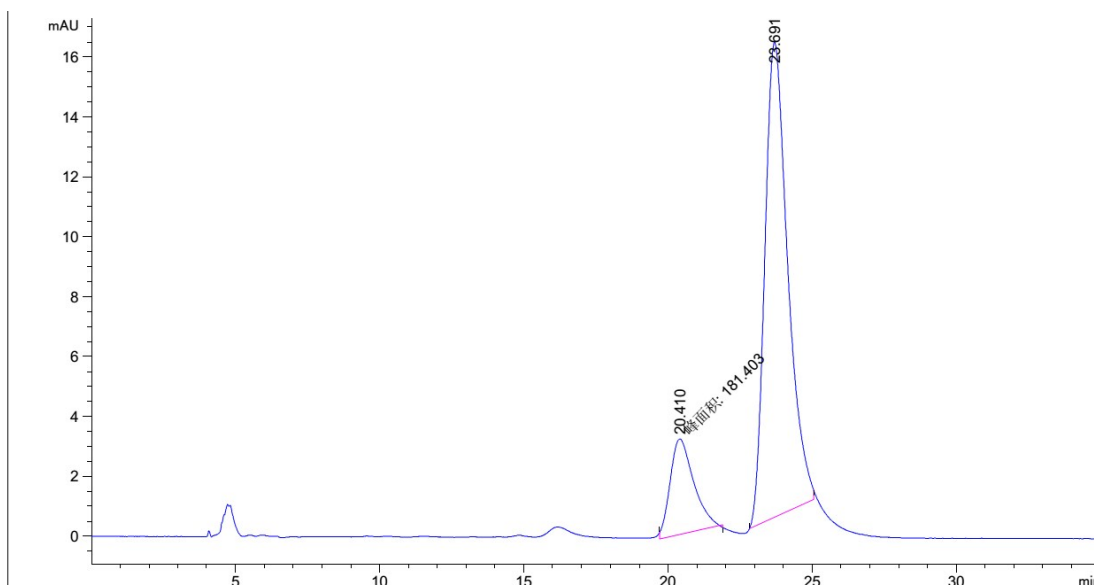

信号 1: DAD1 E, Sig=280,16 Ref=360,100

| 峰 # | 保留时间 [min] | 类型 | 峰宽 [min] | 峰面积 [mAU*s] | 峰高 [mAU] | 峰面积 %   |
|-----|------------|----|----------|-------------|----------|---------|
| 1   | 20.410     | MM | 0.9110   | 166.20190   | 3.04074  | 14.3584 |
| 2   | 23.691     | MM | 1.0094   | 991.32404   | 16.36743 | 85.6416 |

2.13 3-allyl-5-chloro-3-((4-methoxyphenyl)amino)indolin-2-one (**2n**)

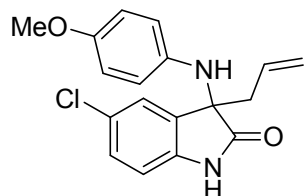

Chemical Formula: C<sub>18</sub>H<sub>17</sub>ClN<sub>2</sub>O<sub>2</sub>  
Exact Mass: 328.10

Isolated as a white solid.  $[\alpha]_D^{25} = +67.2$  (c = 0.90 in CH<sub>2</sub>Cl<sub>2</sub>). The *ee* (63%) was determined by HPLC analysis, Venusil CO column, Hexane/*i*-PrOH 65:35, flow rate = 0.7 mL/min, UV = 254 nm, minor enantiomer  $t_1 = 4.2$  min, major enantiomer  $t_2 = 4.9$  min. <sup>1</sup>H NMR (500 MHz, CDCl<sub>3</sub>) δ 8.91 (s, 1H), 7.33 (d, *J* = 1.9 Hz, 1H), 7.26 (dd, *J* = 8.3, 2.1 Hz, 1H), 6.81 (d, *J* = 8.3 Hz, 1H), 6.70 – 6.48 (m, 2H), 6.45 – 6.16 (m, 2H), 5.77 (td, *J* = 17.1, 7.6 Hz, 1H), 5.27 (dd, *J* = 13.6, 6.8 Hz, 2H), 4.27 (s, 1H), 3.67 (s, 3H), 2.70 (ddd, *J* = 21.3, 13.3, 7.4 Hz, 2H). <sup>13</sup>C NMR (125 MHz, CDCl<sub>3</sub>) δ 180.49, 153.70, 138.56, 132.43, 129.96, 129.14, 128.60, 124.71, 121.53, 117.49, 114.65, 111.71, 77.41, 65.60, 55.53, 44.38. MS (EI) *m/z*: 328 [M<sup>+</sup>].



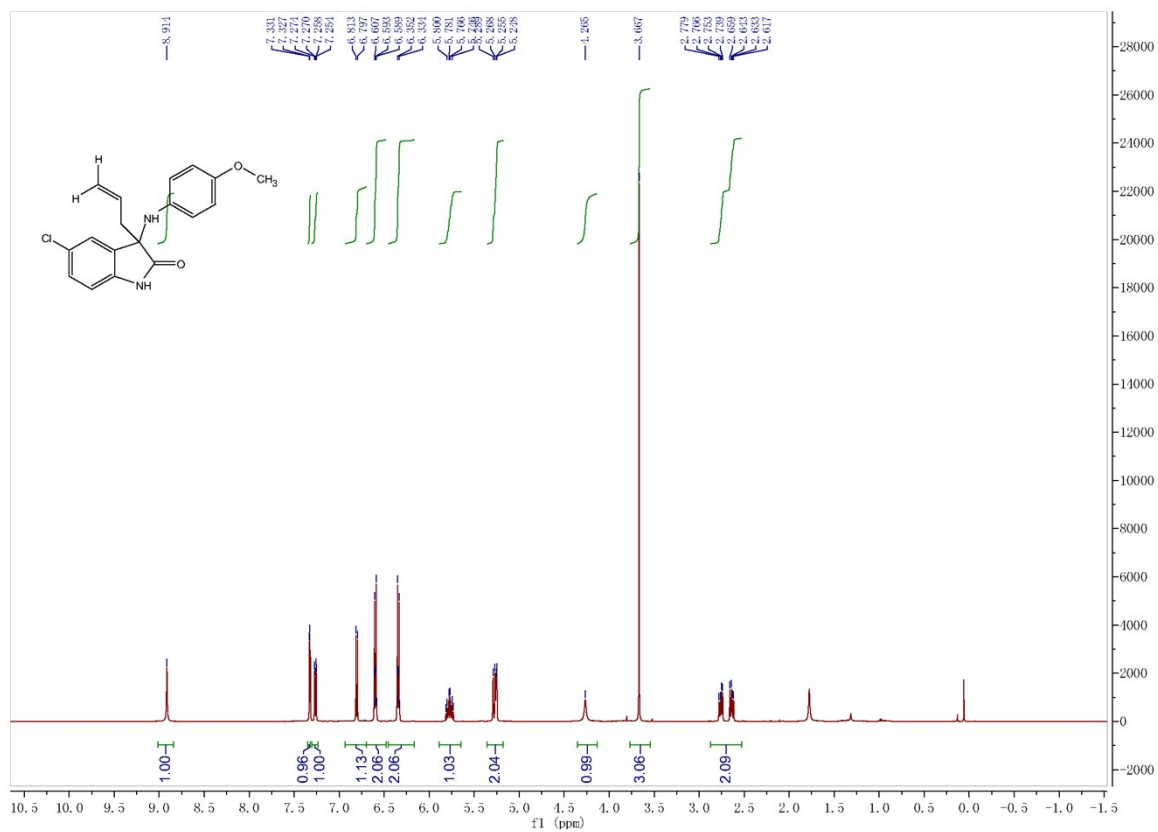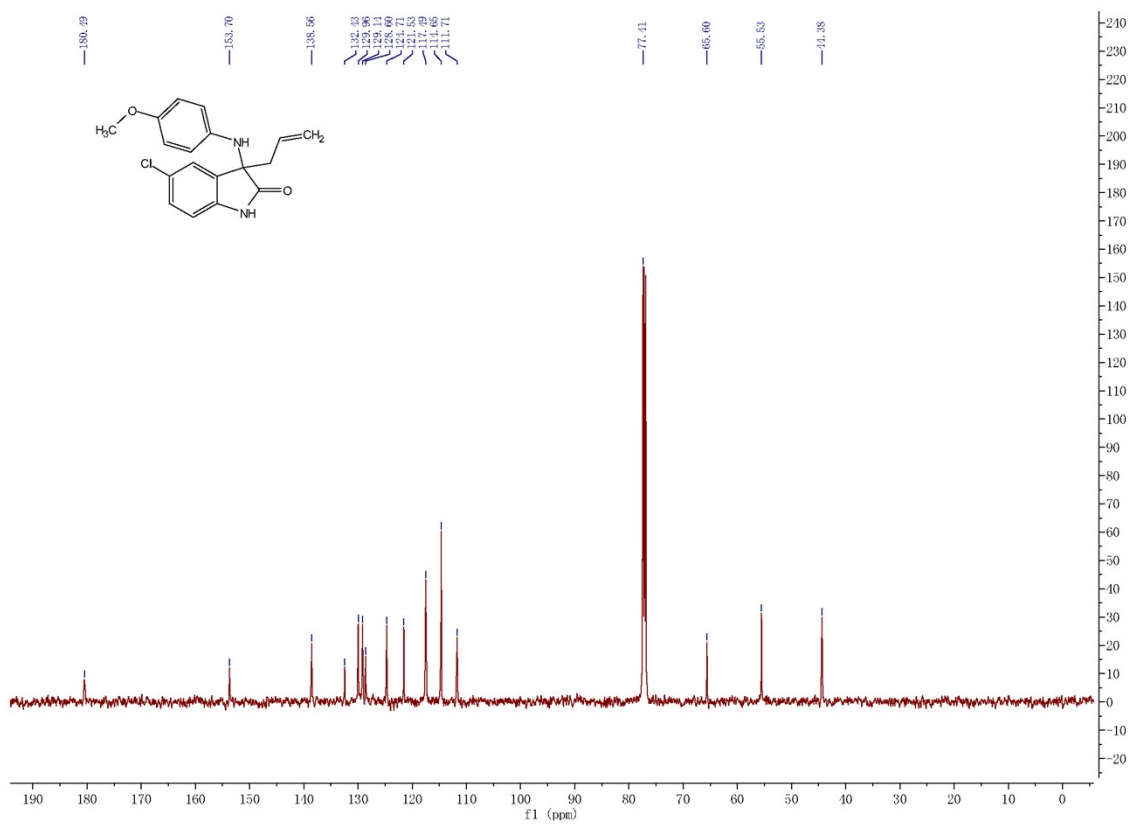

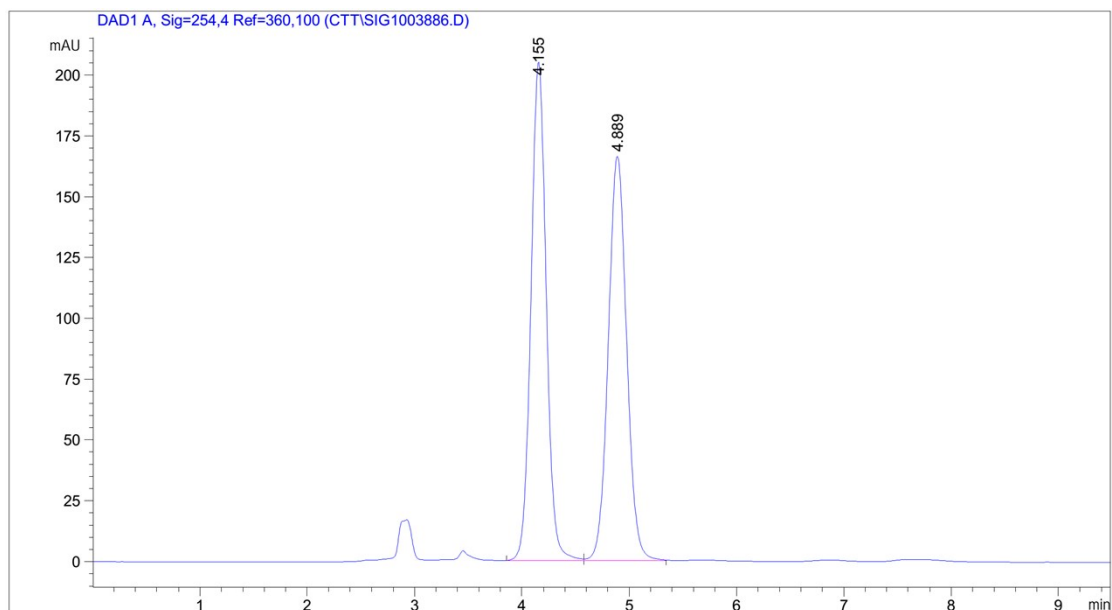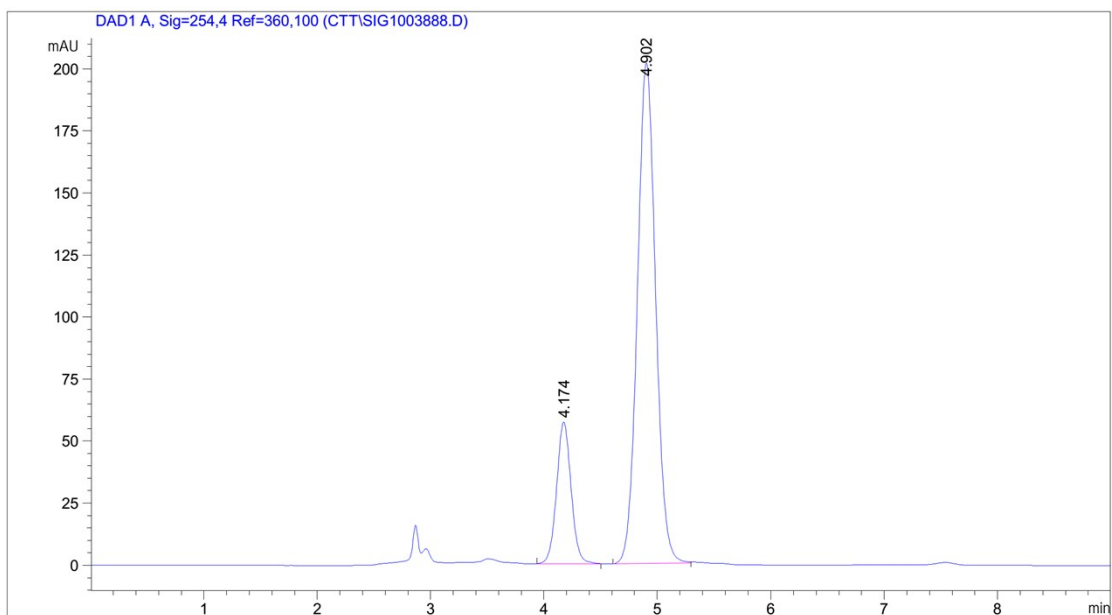

信号 1: DAD1 A, Sig=254,4 Ref=360,100

| 峰 # | 保留时间 [min] | 类型 | 峰宽 [min] | 峰面积 [mAU*s] | 峰高 [mAU]  | 峰面积 %   |
|-----|------------|----|----------|-------------|-----------|---------|
| 1   | 4.174      | BB | 0.1355   | 506.31784   | 57.08508  | 18.3382 |
| 2   | 4.902      | BB | 0.1724   | 2254.68140  | 201.72751 | 81.6618 |

2.14 3-allyl-6-chloro-3-((4-methoxyphenyl)amino)indolin-2-one (2o)

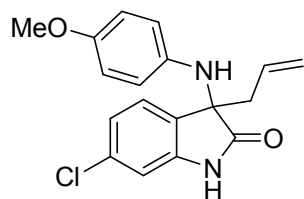

Chemical Formula: C<sub>18</sub>H<sub>17</sub>ClN<sub>2</sub>O<sub>2</sub>  
Exact Mass: 328.10

Isolated as a white solid.  $[\alpha]_D^{25} = +116.4$  ( $c = 0.56$  in CH<sub>2</sub>Cl<sub>2</sub>). The ee (94%) was determined by HPLC analysis, Venusil CA column, Hexane/*i*-PrOH 85:15, flow rate=1.0 mL/min, UV= 280 nm, minor enantiomer  $t_1 = 15.4$  min, major enantiomer  $t_2 = 17.4$  min. <sup>1</sup>H NMR (500 MHz, CDCl<sub>3</sub>)  $\delta$  8.38 (s, 1H), 7.22 (d,  $J = 7.9$  Hz, 1H), 7.03 (d,  $J = 8.0$  Hz, 1H), 6.85 (s, 1H), 6.55 (d,  $J = 8.8$  Hz, 2H), 6.30 (d,  $J = 8.8$  Hz, 2H), 5.72 (dd,  $J = 17.1, 7.6$  Hz, 1H), 5.31 – 5.09 (m, 2H), 4.14 (s, 1H), 3.62 (s, 3H), 2.63 (ddd,  $J = 64.3, 13.3, 7.4$  Hz, 2H). <sup>13</sup>C NMR (126 MHz, CDCl<sub>3</sub>)  $\delta$  180.02, 153.91, 144.00, 141.05, 138.50, 134.72, 130.08, 128.90, 125.46, 123.08, 121.36, 118.13, 114.58, 111.16, 65.24, 55.54, 44.32. MS (EI)  $m/z$ : 328 [M<sup>+</sup>].

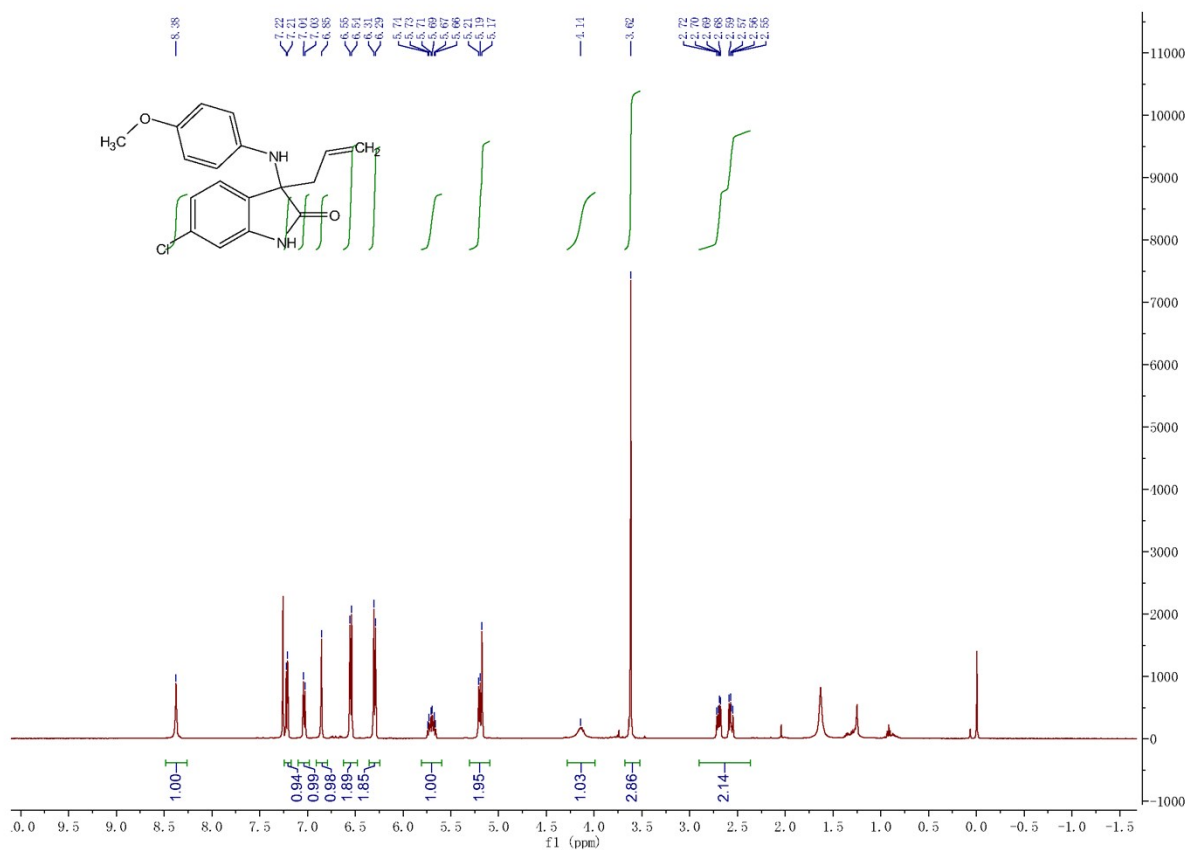

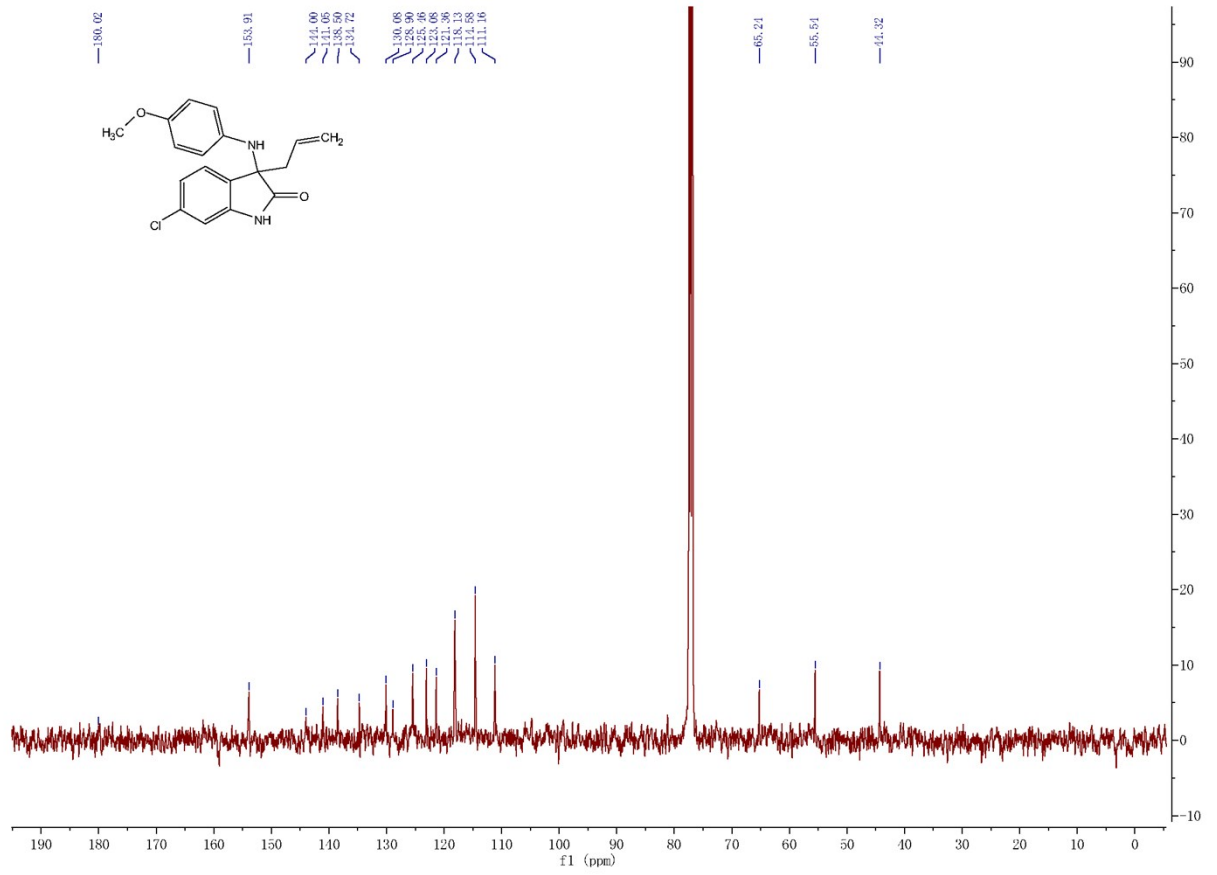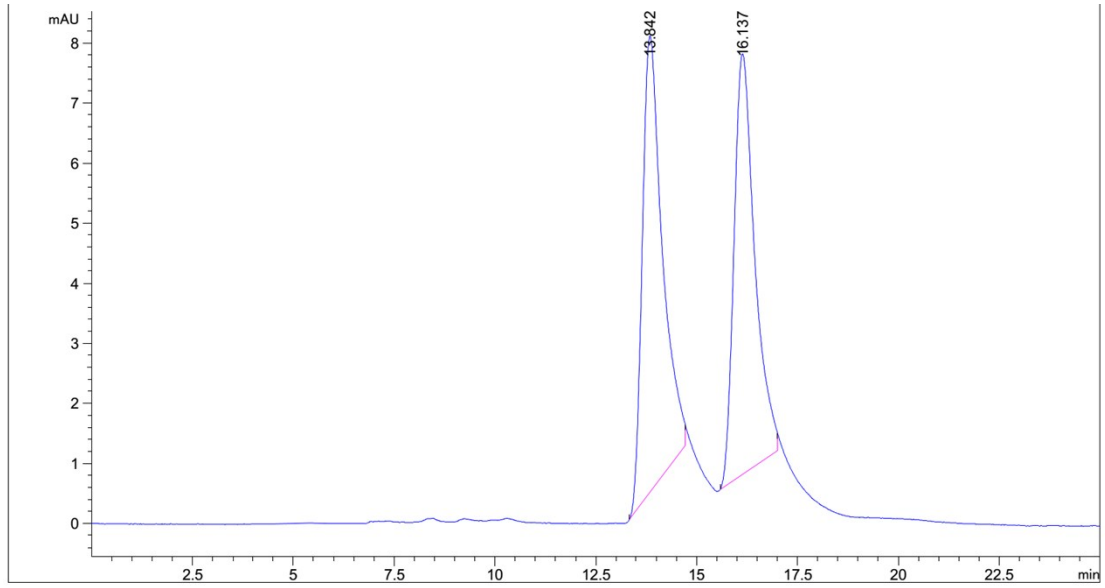

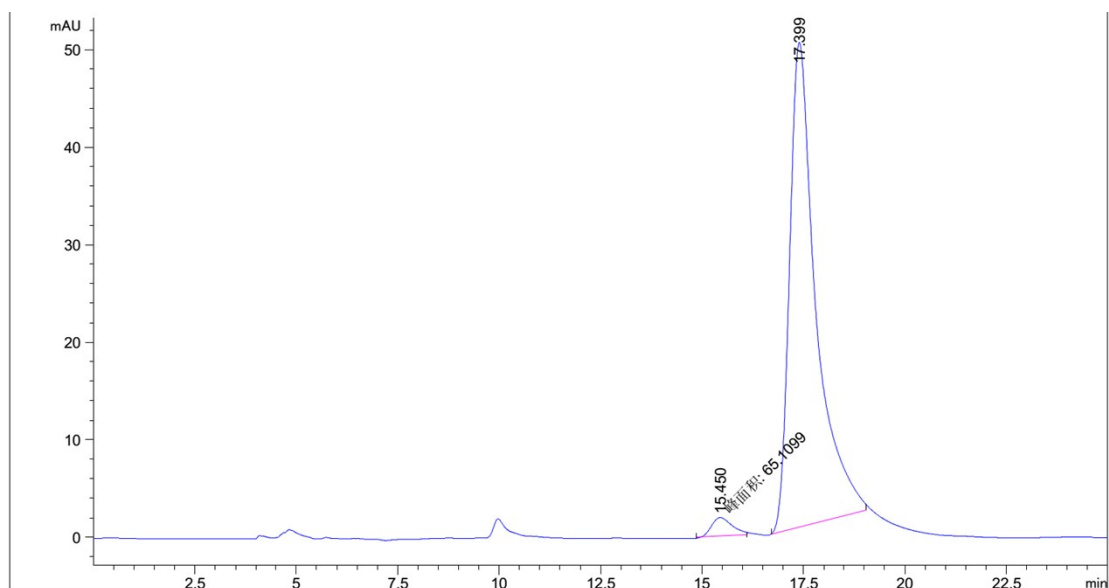

信号 1: DAD1 E, Sig=280,16 Ref=360,100

| 峰 # | 保留时间 [min] | 类型 | 峰宽 [min] | 峰面积 [mAU*s] | 峰高 [mAU] | 峰面积 %   |
|-----|------------|----|----------|-------------|----------|---------|
| 1   | 15.450     | MM | 0.5803   | 65.10992    | 1.87015  | 2.8205  |
| 2   | 17.399     | BB | 0.6587   | 2243.36157  | 49.69175 | 97.1795 |

2.15 3-allyl-7-fluoro-3-((4-methoxyphenyl)amino)indolin-2-one (**2p**)

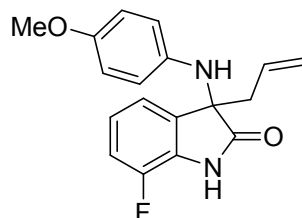

Chemical Formula: C<sub>18</sub>H<sub>17</sub>FN<sub>2</sub>O<sub>2</sub>  
Exact Mass: 312.13

Isolated as a brown solid.  $[\alpha]_D^{25} = +80.6$  (c=0.71 in CH<sub>2</sub>Cl<sub>2</sub>). The ee (96%) was determined by HPLC analysis, Venusil CA column, Hexane/i-PrOH 80:20, flow rate=0.7 mL/min, UV= 280 nm, minor enantiomer t<sub>1</sub> = 17.5 min, major enantiomer t<sub>2</sub>= 23.4 min. <sup>1</sup>H NMR (500 MHz, Chloroform-*d*) δ 8.09 (s, 1H), 7.11 (dd, *J* = 6.1, 2.3 Hz, 1H), 7.03 – 6.93 (m, 2H), 6.74 – 6.65 (m, 2H), 6.63 – 6.56 (m, 2H), 5.59 (dtd, *J* = 17.8, 8.4, 6.5 Hz, 1H), 5.15 – 4.98 (m, 2H), 3.69 (s, 3H), 2.63 (ddd, *J* = 61.8, 13.4, 7.4 Hz, 2H). <sup>13</sup>C NMR (126 MHz, CDCl<sub>3</sub>) δ 177.68, 151.92, 145.16, 138.80, 128.88, 122.79, 120.01, 119.21, 115.56, 113.85, 59.46, 54.79, 41.98. MS (EI) *m/z*: 312 [M<sup>+</sup>].



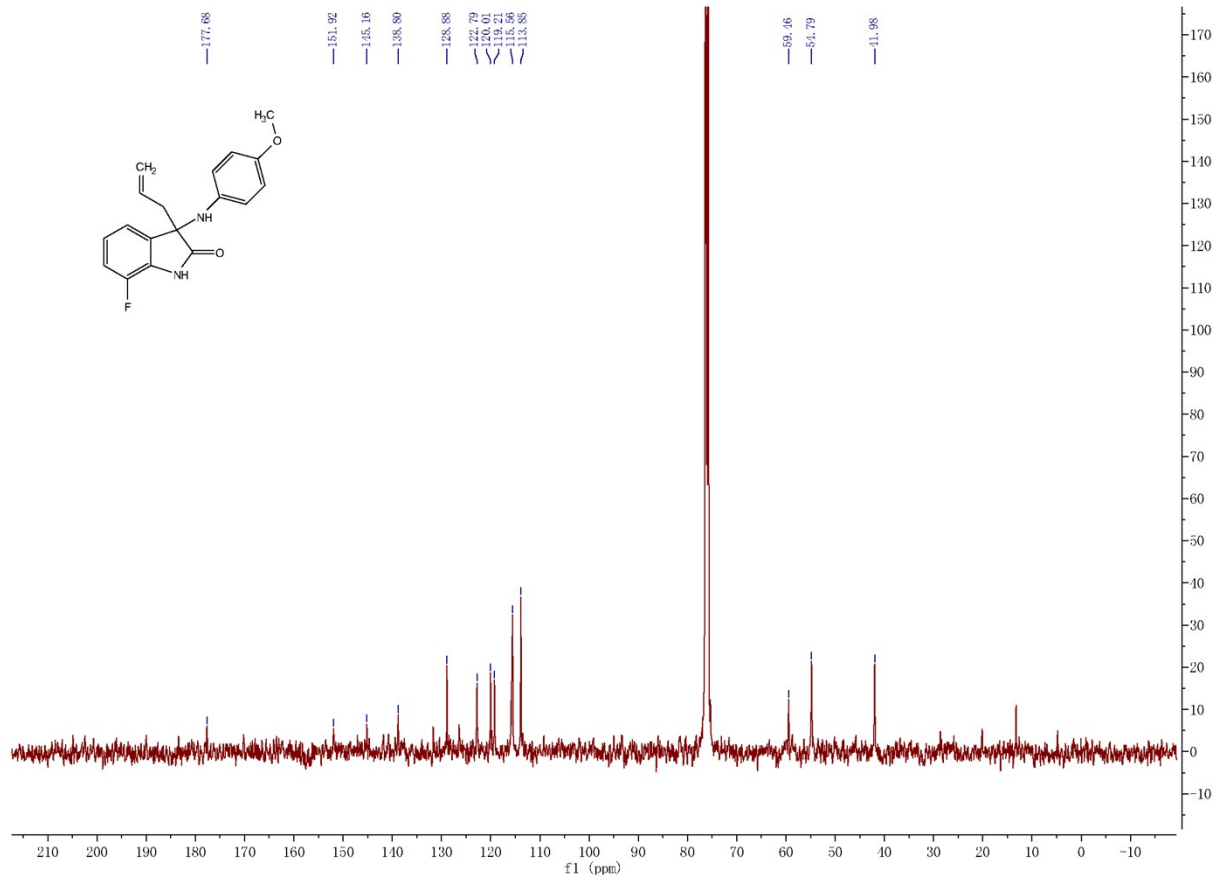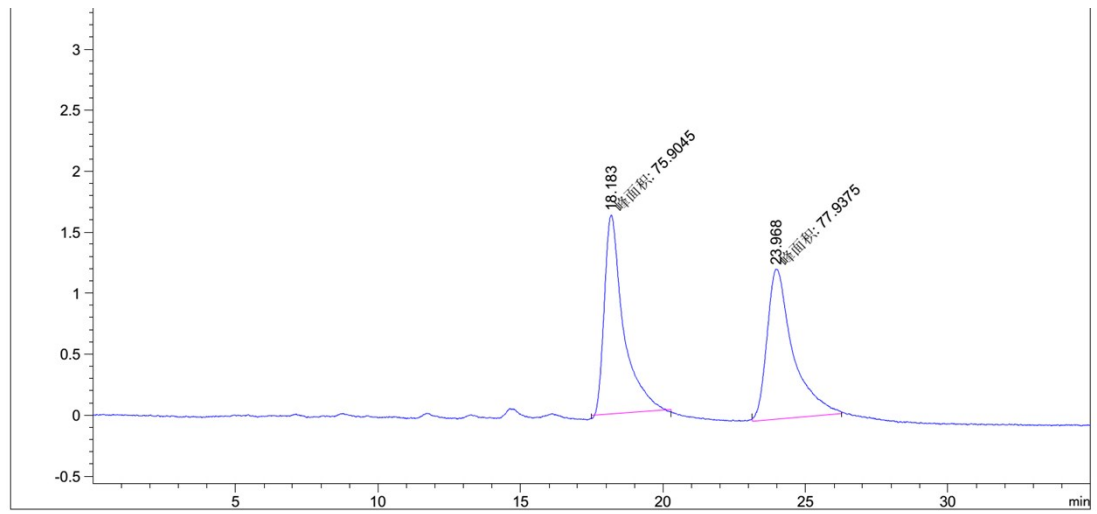

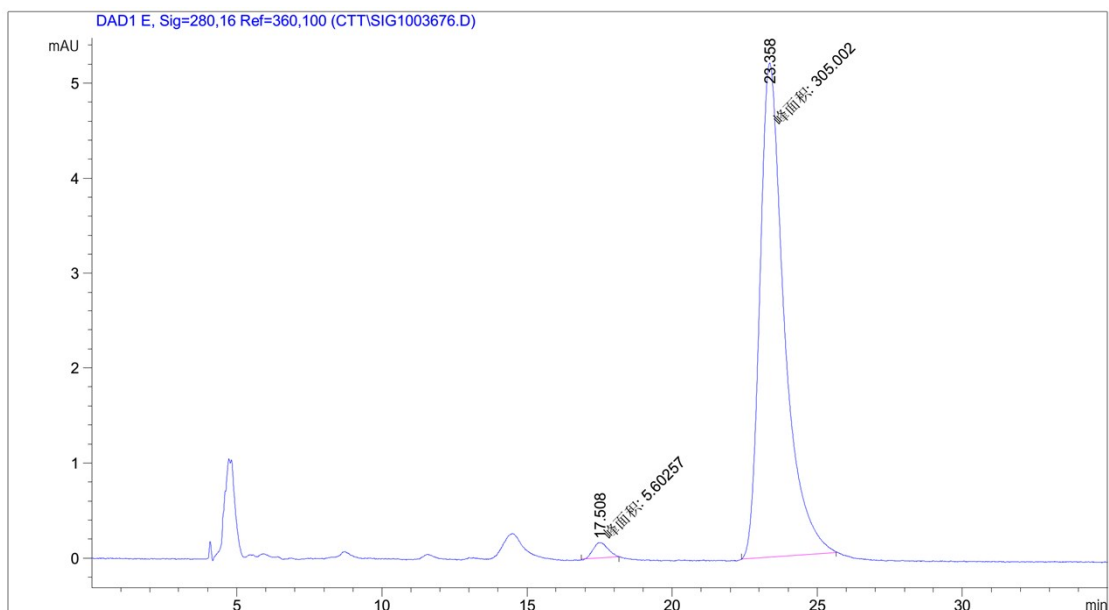

信号 1: DAD1 E, Sig=280,16 Ref=360,100

| 峰 # | 保留时间 [min] | 类型 | 峰宽 [min] | 峰面积 [mAU*s] | 峰高 [mAU]   | 峰面积 %   |
|-----|------------|----|----------|-------------|------------|---------|
| 1   | 17.508     | MM | 0.5851   | 5.60257     | 1.59589e-1 | 1.8038  |
| 2   | 23.358     | MM | 0.9767   | 305.00156   | 5.20454    | 98.1962 |

### 3. X-ray crystallographic analysis of 2a

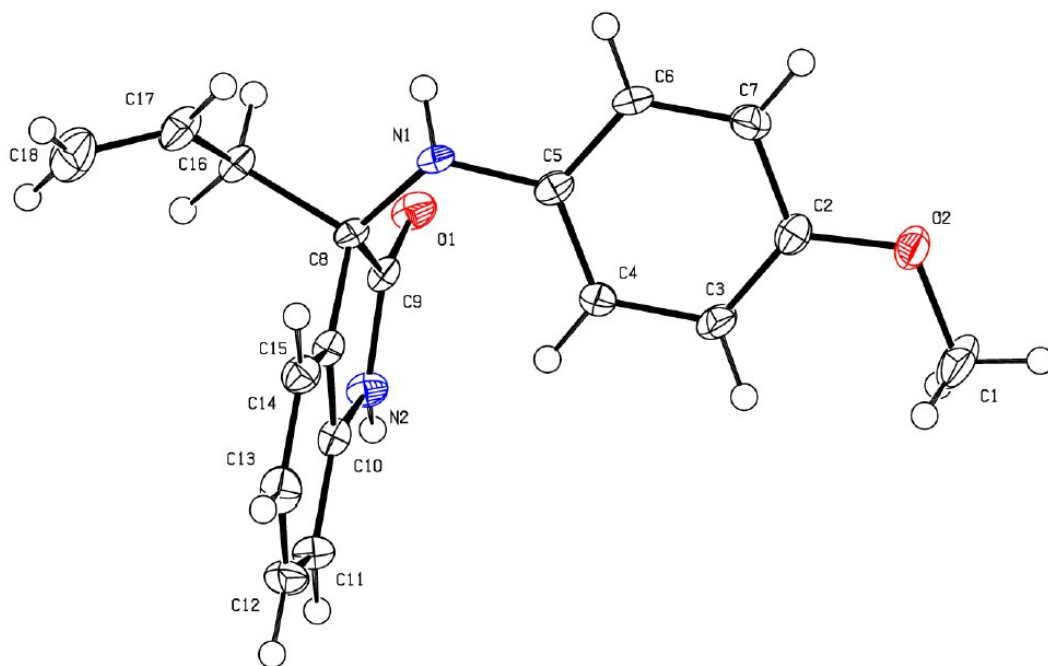

Supplement: c6ob00551a1.pdf [file c6ob00551a1.pdf]
